# Supplementary material for: A detailed density functional theory exploration of the photodissociation mechanism of ruthenium complexes for photoactivated chemotherapy
Source: Royal Society of Chemistry journal article supplement (doi:10.1039/d4dt00834k), 2024-01-01
Supplement: d4dt00834k1.pdf [file d4dt00834k1.pdf]

## Supporting Information

### A Detailed Density Functional Theory Exploration of the Photodissociation Mechanism of Ruthenium Complexes for Photoactivated Chemotherapy

Daniele Belletto,<sup>a</sup> Fortuna Ponte,<sup>a\*</sup> Gloria Mazzone<sup>a</sup> and Emilia Sicilia<sup>a\*</sup>

<sup>a</sup> Department of Chemistry and Chemical Technologies, Università della Calabria, Ponte P. Bucci, 87036 Arcavacata di Rende (CS) (Italy).

**Figure S1.** Optimized geometry of the **Ru** complex together with selected bond lengths (in Å). Atoms coordinated to ruthenium are labelled. S2

**Figure S2.** Simulated absorption spectra of the **Ru** complex compared with the corresponding experimental one. The experimental spectrum is reported in ref 1 S3

**Table S1.** TD-DFT benchmark for the reproduction of the experimental spectrum of the **Ru** complex on the structure optimized at B3LYP-D3/6-31G\* level in CH<sub>3</sub>CN implicit solvent. S4

**Table S2.** Excitation energies  $\Delta E$ (eV), MO contribution % and theoretical assignment for the the most important singlet states of **Ru** complex calculated by M05 functional. S6

**Figure S3.** Natural Transition Orbitals (NTOs) for the most important transitions of Ru complex. S7

**Table S3.** Excitation energies  $\Delta E$ (eV), MO contribution % and theoretical assignment for the triplet states below the bright state (486 nm) of Ru complex calculated by M05 functional. S8

**Figure S4.** Natural Transition Orbitals (NTOs) for the triplet states T1-T6 of Ru complex below the bright state (486 nm). S9

**Table S4.** Selected bond distances (Å) for the ground state and the triplet states Ta, Tb, c and Td of the Ru complex. S10

**Table S5.** Cartesian coordinates of GS and Ta, Tb, Tc and Td triplet states. S11

**Table S6.** Cartesian coordinates of all the stationary points intercepted along the light-induced substitution pathways . S18

**References** S36

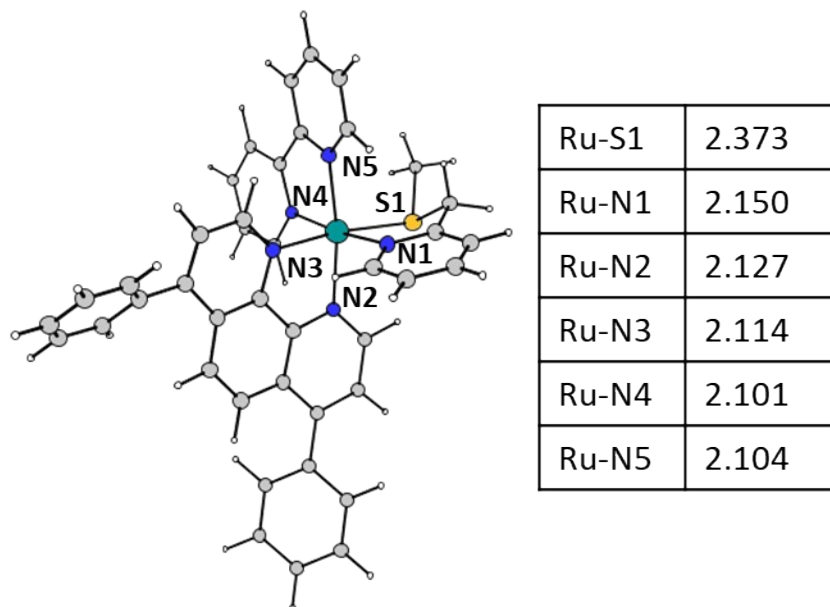

**Figure S1**

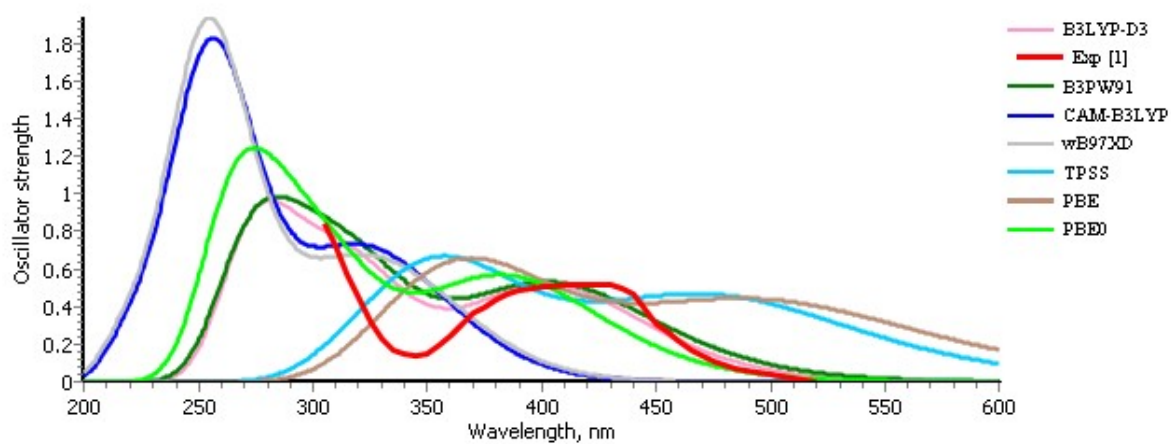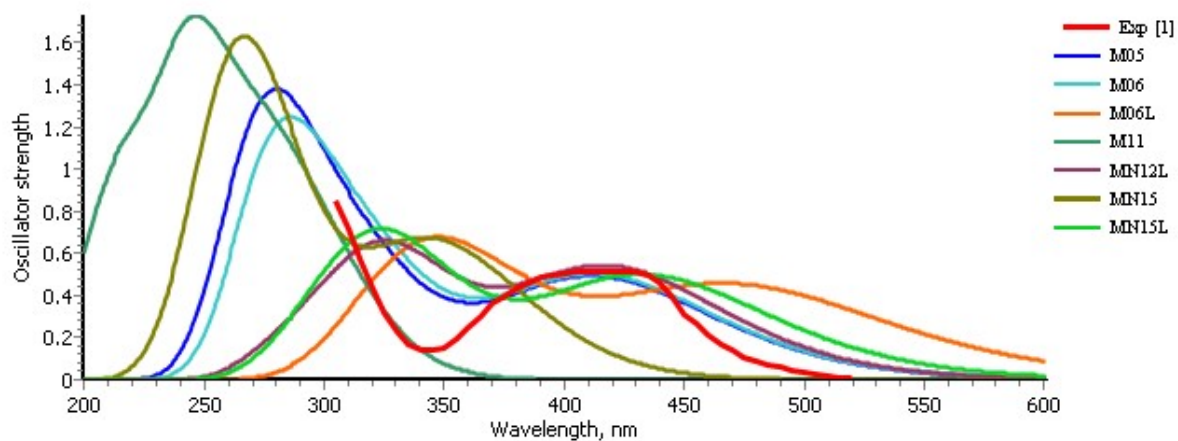

Figure S2

Table S1.

|                                 | $\lambda$ | eV   | $f$      | MO contribution <sup>a</sup>                                                                                     |
|---------------------------------|-----------|------|----------|------------------------------------------------------------------------------------------------------------------|
| <b>exp<sup>b</sup></b>          | 430       |      |          |                                                                                                                  |
| <b>B3LYP-D3</b>                 | 467       | 2.65 | 0.002    | H $\rightarrow$ L (69%)<br>H $\rightarrow$ L+1 (21%)                                                             |
|                                 | 438       | 2.83 | 0.048    | H -1 $\rightarrow$ L+1 (33%)<br>H -2 $\rightarrow$ L+1 (22%)                                                     |
| <b>B3PW91</b>                   | 468       | 2.65 | 0.003    | H $\rightarrow$ L (72%)<br>H $\rightarrow$ L+1 (22%)                                                             |
|                                 | 441       | 2.81 | 0.042    | H -1 $\rightarrow$ L+1 (33%)<br>H -1 $\rightarrow$ L (24%)                                                       |
|                                 | 408       | 3.04 | 0.106    | H-1 $\rightarrow$ L+2 (72%)                                                                                      |
| <b>camB3LYP</b>                 | 365       | 3.39 | 0.001    | H-1 $\rightarrow$ L+1 (71%)                                                                                      |
|                                 | 315       |      | 0.266    | H $\rightarrow$ L+2 (83%)                                                                                        |
| <b>B97D</b>                     | 618       | 2.01 | 0.003    | H $\rightarrow$ L (95%)                                                                                          |
|                                 | 551       | 3.53 | 0.165    | H $\rightarrow$ L (57%)                                                                                          |
| <b><math>\omega</math>B97XD</b> | 371       | 3.34 | 0.001    | H-1 $\rightarrow$ L+1 (63%)                                                                                      |
|                                 | 355       | 3.49 | 0.158    | H $\rightarrow$ L (55%)                                                                                          |
| <b>TPSS</b>                     | 581       | 2.13 | 0.003    | H $\rightarrow$ L (96%)                                                                                          |
|                                 | 528       | 2.34 | 0.015    | H-1 $\rightarrow$ L+1 (50%)<br>H-1 $\rightarrow$ L+2 (21%)                                                       |
| <b>PBE</b>                      | 626       | 1.98 | 0.003    | H $\rightarrow$ L (95%)                                                                                          |
|                                 | 565       | 2.19 | 0.011    | H-1 $\rightarrow$ L+1 (61%)<br>H-1 $\rightarrow$ L+2 (25%)                                                       |
| <b>PBE0</b>                     | 439       | 2.82 | 0.002    | H $\rightarrow$ L+1 (32%)<br>H $\rightarrow$ L (30%)<br>H-1 $\rightarrow$ L (18%)<br>H-1 $\rightarrow$ L+1 (17%) |
|                                 | 416       | 2.98 | 0.063    | H $\rightarrow$ L (25%)<br>H-2 $\rightarrow$ L+1 (20%)                                                           |
| <b>M05</b>                      | 486       | 2.55 | 0.002    | H $\rightarrow$ L+1 (55%)<br>H $\rightarrow$ L (40%)                                                             |
|                                 | 434       | 2.86 | 0.143    | H-2 $\rightarrow$ L (87%)                                                                                        |
| <b>M06</b>                      | 485       | 2.56 | 0.002    | H $\rightarrow$ L+1 (49%)<br>H $\rightarrow$ L (44%)                                                             |
|                                 | 453       | 2.74 | 0.045    | H-1 $\rightarrow$ L (32%)<br>H-1 $\rightarrow$ L+1 (20%)                                                         |
| <b>M06L</b>                     | 576       | 2.15 | 0.004    | H $\rightarrow$ L (97%)                                                                                          |
|                                 | 524       | 2.36 | 0.016    | H-1 $\rightarrow$ L+1 (47%)<br>H-1 $\rightarrow$ L+2 (24%)                                                       |
| <b>M11</b>                      | 378       | 3.28 | 0.000(1) | H-2 $\rightarrow$ L+17 (27%)<br>H-1 $\rightarrow$ L+17 (26%)                                                     |
|                                 | 310       | 4.00 | 0.013    | H $\rightarrow$ L (28%)<br>H-1 $\rightarrow$ L+1 (19%)                                                           |
| <b>MN12L</b>                    | 479       | 2.58 | 0.003    | H $\rightarrow$ L (99%)                                                                                          |
|                                 | 455       | 2.72 | 0.025    | H-1 $\rightarrow$ L+1 (67%)                                                                                      |

|              |     |      |          |                                    |
|--------------|-----|------|----------|------------------------------------|
|              |     |      |          | H → L+ (15%)                       |
| <b>MN15</b>  | 419 | 2.96 | 0.000(1) | H-1 → L+9 (47%)<br>H-2 → L+9 (16%) |
|              | 373 | 3.32 | 0.147    | H → L+ (57%)<br>H-2 → L+1 (20%)    |
| <b>MN15L</b> | 514 | 2.41 | 0.004    | H → L (98%)                        |
|              | 472 | 2.63 | 0.013    | H → L+2 (64%)                      |

<sup>a</sup>Only contributions larger than 15% are reported; <sup>b</sup> data in CH<sub>3</sub>CN from ref 2.

**Table S2**

| Band | State | $\Delta E$ | $\lambda$ | $f$   | MO contribution <sup>a</sup>                                                                                  | Theoretical Assignment <sup>b</sup>                                                           |
|------|-------|------------|-----------|-------|---------------------------------------------------------------------------------------------------------------|-----------------------------------------------------------------------------------------------|
| I    | Tr1   | 2.55       | 486       | 0.002 | H $\rightarrow$ L+1 61%<br>H $\rightarrow$ L 33%                                                              | ML <sub>2</sub> CT (78%)                                                                      |
|      | Tr2   | 2.86       | 434       | 0.140 | H-2 $\rightarrow$ L 86%                                                                                       | ML <sub>2/3</sub> CT (70%)                                                                    |
|      | Tr3   | 3.07       | 403       | 0.123 | H-2 $\rightarrow$ L+1 34%<br>H $\rightarrow$ L+2 32%                                                          | ML <sub>2/3</sub> CT (71%)                                                                    |
| II   | Tr4   | 3.93       | 316       | 0.256 | H-3 $\rightarrow$ L+2 71%                                                                                     | L <sub>3</sub> C (80%)                                                                        |
|      | Tr5   | 4.24       | 292       | 0.151 | H-4 $\rightarrow$ L+2 33%<br>H-4 $\rightarrow$ L+1 13%<br>H $\rightarrow$ L+7 13%                             | L <sub>3</sub> C (69%)/ ML <sub>3</sub> CT (23%)                                              |
|      | Tr6   | 4.43       | 280       | 0.233 | H-7 $\rightarrow$ L 41%<br>H-7 $\rightarrow$ L+1 13%                                                          | L <sub>2</sub> C (63%) /ML <sub>2</sub> CT (20%)                                              |
|      | Tr7   | 4.48       | 277       | 0.406 | H-9 $\rightarrow$ L 24%<br>H-4 $\rightarrow$ L 22%<br>H-8 $\rightarrow$ L+2 15%                               | L <sub>2</sub> C (66%) / L <sub>3</sub> L <sub>2</sub> CT (26%)                               |
|      | Tr8   | 4.75       | 261       | 0.127 | H-8 $\rightarrow$ L+2 24%<br>H-9 $\rightarrow$ L 16%<br>H-10 $\rightarrow$ L 15%<br>H-1 $\rightarrow$ L+8 12% | L <sub>3</sub> C (51%) / L <sub>3</sub> L <sub>2</sub> CT (25%) /<br>ML <sub>2</sub> CT (20%) |

<sup>a</sup>Only contributions larger than 11% are reported.

<sup>b</sup>Only contributions larger than 18% are reported. TheoDORÉ software together with NTO plots were used for assigning states character.

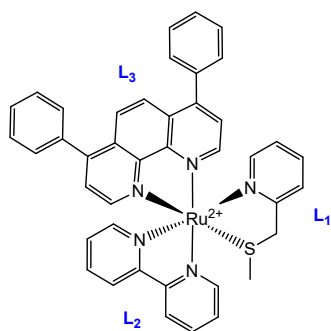

| Ru       | Tr1 (486 nm) | Tr2 (434 nm) | Tr3 (403 nm) | Tr4 (316 nm) |
|----------|--------------|--------------|--------------|--------------|
| Particle |              |              |              |              |
| Hole     |              |              |              |              |
|          | Tr5 (292 nm) | Tr6 (280 nm) | Tr7 (277 nm) | Tr8 (261 nm) |
| Particle |              |              |              |              |
| Hole     |              |              |              |              |

Figure S3

**Table S3.**

| State | $\Delta E$ | $\lambda$ | MO contribution <sup>a</sup>                                                                             | Theoretical Assignment <sup>b</sup>               |
|-------|------------|-----------|----------------------------------------------------------------------------------------------------------|---------------------------------------------------|
| T1    | 1.9<br>9   | 622       | H-3 $\rightarrow$ L+2 18%<br>H-1 $\rightarrow$ L+2 16%                                                   | L <sub>3</sub> C (77%) / ML <sub>3</sub> CT (18%) |
| T2    | 2.2<br>2   | 558       | H-1 $\rightarrow$ L+1 19%<br>H $\rightarrow$ L+1 15%<br>H $\rightarrow$ L 15%<br>H-1 $\rightarrow$ L 12% | L <sub>2</sub> C (47%) / ML <sub>2</sub> CT (43%) |
| T3    | 2.2<br>9   | 542       | H-1 $\rightarrow$ L 27%<br>H-1 $\rightarrow$ L+1 26%<br>H-2 $\rightarrow$ L+1 15%                        | ML <sub>3</sub> CT (46%) / L <sub>3</sub> C (42%) |
| T4    | 2.4<br>8   | 501       | H-2 $\rightarrow$ L+1 39%<br>H-2 $\rightarrow$ L 35%                                                     | ML <sub>2</sub> CT (63%) / L <sub>2</sub> C (23%) |
| T5    | 2.4<br>9   | 497       | H $\rightarrow$ L+1 35%<br>H $\rightarrow$ L+9 33%<br>H-1 $\rightarrow$ L 17%                            | ML <sub>1/2/3</sub> CT (54%) / MC (25%)           |
| T6    | 2.5<br>5   | 486       | H $\rightarrow$ L 33%<br>H $\rightarrow$ L+9 23%<br>H-1 $\rightarrow$ L+1 13%                            | ML <sub>2</sub> CT (60%) / MC (19%)               |



| Ru       | T1 (622 nm)                                                                         | T2 (558 nm)                                                                         | T3 (542 nm)                                                                           |
|----------|-------------------------------------------------------------------------------------|-------------------------------------------------------------------------------------|---------------------------------------------------------------------------------------|
| Particle | 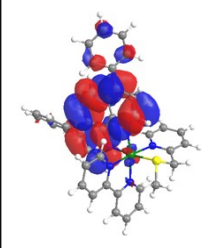   |    |    |
| Hole     |    |    |    |
|          | T4 (501 nm)                                                                         | T5 (497 nm)                                                                         | T6 (486 nm)                                                                           |
| Particle |   |   |   |
| Hole     |  |  |  |

Figure S4

**Table S4**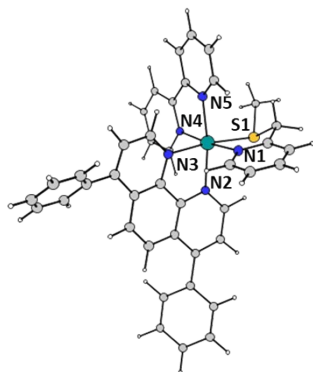

| State | Ru-S  | Ru-N1 | Ru-N2 | Ru-N3 | Ru-N4 | Ru-N5 |
|-------|-------|-------|-------|-------|-------|-------|
| S0    | 2.373 | 2.150 | 2.105 | 2.090 | 2.080 | 2.083 |
| Ta    | 2.395 | 2.137 | 2.028 | 2.120 | 2.123 | 2.146 |
| Tb    | 2.400 | 2.176 | 2.151 | 2.122 | 2.071 | 2.067 |
| Tc    | 2.449 | 2.805 | 2.140 | 2.133 | 2.387 | 2.172 |
| Td    | 2.949 | 2.188 | 2.193 | 2.422 | 2.126 | 2.115 |

**Table S5**

| <b>GS</b> E=-2347.527007 Hartree |             |             |             |
|----------------------------------|-------------|-------------|-------------|
| Ru                               | 0.74933500  | -0.74904900 | -0.31288000 |
| C                                | 3.42371300  | -0.38942300 | 0.89070500  |
| C                                | 3.56656600  | -0.23072800 | -1.42748500 |
| C                                | 4.93863200  | -0.02744300 | -1.37916800 |
| C                                | 5.56567200  | -0.01186500 | -0.13786900 |
| C                                | 4.80007100  | -0.19489200 | 1.00700400  |
| C                                | 2.52606700  | -0.58246400 | 2.04403300  |
| C                                | 0.33016900  | -0.93347900 | 2.73431700  |
| C                                | 0.69302500  | -0.91023300 | 4.07325000  |
| C                                | 2.03295700  | -0.72080800 | 4.39583200  |
| C                                | 2.95521000  | -0.55012300 | 3.37104700  |
| H                                | 3.03779200  | -0.25776300 | -2.37271700 |
| H                                | 5.49348700  | 0.11255400  | -2.29917100 |
| H                                | 6.63611000  | 0.14035600  | -0.05800000 |
| H                                | 5.27587000  | -0.18578100 | 1.97910800  |
| H                                | -0.70415700 | -1.06558200 | 2.43831100  |
| H                                | -0.06469500 | -1.03701000 | 4.83711400  |
| H                                | 2.35774800  | -0.69795900 | 5.42988300  |
| H                                | 3.99863600  | -0.38839300 | 3.60880500  |
| N                                | 1.21842600  | -0.78659200 | 1.73763200  |
| N                                | 2.82271400  | -0.41062100 | -0.32607100 |
| C                                | 0.11255800  | -0.95318300 | -4.70025800 |
| C                                | -0.01788400 | 0.37668400  | -5.07175500 |
| C                                | 0.02186500  | 1.35144700  | -4.03310900 |
| C                                | 0.24308000  | 0.90771500  | -2.71028500 |
| C                                | 0.32138000  | -1.30363400 | -3.36504700 |
| C                                | -0.20228700 | 2.74949200  | -4.24539300 |
| C                                | 0.29409000  | 1.85397200  | -1.63202900 |
| C                                | 0.13312100  | 3.23497100  | -1.88061700 |
| C                                | -0.14686800 | 3.64627700  | -3.22259500 |
| C                                | 0.20153100  | 4.12892700  | -0.77249200 |
| C                                | 0.36664100  | 3.57292900  | 0.48811300  |
| C                                | 0.49543800  | 2.19187000  | 0.64539400  |
| H                                | -0.44336700 | 3.09484000  | -5.24309600 |
| H                                | 0.08665700  | -1.73821000 | -5.44714900 |
| H                                | 0.44560300  | -2.34455700 | -3.08991000 |
| H                                | -0.34459300 | 4.69255700  | -3.42013600 |
| H                                | 0.42356900  | 4.20659100  | 1.36548700  |
| H                                | 0.63095400  | 1.76181400  | 1.63080600  |
| N                                | 0.47265600  | 1.34554200  | -0.38024700 |
| N                                | 0.40554800  | -0.40835400 | -2.38371600 |
| C                                | 0.10313000  | 5.59669600  | -0.91961100 |
| C                                | -0.80595100 | 6.31871000  | -0.13342800 |
| C                                | 0.94114400  | 6.29329000  | -1.80284400 |
| C                                | -0.88607300 | 7.70444800  | -0.24021900 |
| H                                | -1.46450200 | 5.78915500  | 0.54874400  |
| C                                | 0.86628200  | 7.68025600  | -1.89870400 |
| H                                | 1.66903000  | 5.74978100  | -2.39795900 |
| C                                | -0.05003800 | 8.38851400  | -1.12193200 |
| H                                | -1.60313400 | 8.24925800  | 0.36603400  |
| H                                | 1.52800200  | 8.20730500  | -2.57899300 |
| H                                | -0.11059600 | 9.46953400  | -1.20185400 |
| C                                | -0.18789400 | 0.72903800  | -6.49759000 |
| C                                | -1.18100000 | 0.09888500  | -7.26051800 |
| C                                | 0.66293400  | 1.65434300  | -7.12004800 |

|           |                        |             |              |
|-----------|------------------------|-------------|--------------|
| C         | -1.32998700            | 0.39996200  | -8.61163600  |
| H         | -1.84915500            | -0.61480900 | -6.78754600  |
| C         | 0.51856600             | 1.94444500  | -8.47410700  |
| H         | 1.45418200             | 2.12968700  | -6.54790700  |
| C         | -0.48060400            | 1.32227300  | -9.22179300  |
| H         | -2.11130300            | -0.08667700 | -9.18720600  |
| H         | 1.19064100             | 2.65519600  | -8.94490100  |
| H         | -0.59530500            | 1.55351000  | -10.27634500 |
| C         | -4.03193200            | -1.96165600 | -0.08872300  |
| C         | -3.03770500            | -2.90779500 | 0.12890400   |
| C         | -1.70081600            | -2.51699700 | 0.11427600   |
| C         | -2.30931100            | -0.32659200 | -0.34359400  |
| C         | -3.65885300            | -0.64282500 | -0.32559200  |
| H         | -5.07699800            | -2.25112000 | -0.07636800  |
| H         | -3.28847400            | -3.94573700 | 0.31576100   |
| H         | -1.98547300            | 0.68861000  | -0.53554400  |
| H         | -4.39301600            | 0.13417300  | -0.50275600  |
| N         | -1.33727600            | -1.23325900 | -0.12820600  |
| C         | -0.62189300            | -3.50891400 | 0.42543100   |
| S         | 0.90273600             | -3.10886900 | -0.50637900  |
| C         | 2.14927300             | -3.85113100 | 0.58099400   |
| H         | 3.12321500             | -3.60207100 | 0.15655000   |
| H         | 2.07161800             | -3.45781700 | 1.59561100   |
| H         | 2.01821600             | -4.93417400 | 0.57894100   |
| H         | -0.37012000            | -3.46486000 | 1.49007700   |
| H         | -0.93627200            | -4.52764600 | 0.19338800   |
| <b>Ta</b> | E=-2347.448237 Hartree |             |              |
| Ru        | 0.87461100             | -0.70729100 | -0.38206800  |
| C         | 3.50997800             | -0.43905400 | 0.99961100   |
| C         | 3.77559600             | -0.27516500 | -1.31130600  |
| C         | 5.14912600             | -0.11701600 | -1.18810000  |
| C         | 5.71043900             | -0.12633900 | 0.08289800   |
| C         | 4.88194800             | -0.28739100 | 1.18703600   |
| C         | 2.54962900             | -0.60802600 | 2.10357700   |
| C         | 0.30161800             | -0.86791400 | 2.66787000   |
| C         | 0.59316100             | -0.88734200 | 4.02400500   |
| C         | 1.92095900             | -0.76385800 | 4.41860600   |
| C         | 2.90709200             | -0.61632800 | 3.45069400   |
| H         | 3.29105400             | -0.27297000 | -2.27900300  |
| H         | 5.75369900             | 0.01028900  | -2.07774200  |
| H         | 6.77925500             | -0.00804600 | 0.21879600   |
| H         | 5.30584400             | -0.29377700 | 2.18240000   |
| H         | -0.72057700            | -0.94415200 | 2.31475100   |
| H         | -0.20891500            | -0.99370200 | 4.74391500   |
| H         | 2.18951300             | -0.77370400 | 5.46869500   |
| H         | 3.94118400             | -0.50659200 | 3.74923600   |
| N         | 1.25451800             | -0.74675900 | 1.72993300   |
| N         | 2.97583500             | -0.43625300 | -0.24703000  |
| C         | 0.67973900             | -0.89751400 | -4.70732400  |
| C         | 0.20585400             | 0.40423200  | -5.07152600  |
| C         | 0.16400300             | 1.38358800  | -4.02152000  |
| C         | 0.45666500             | 0.97754900  | -2.70105400  |
| C         | 0.96916300             | -1.22236100 | -3.41822000  |
| C         | -0.09900700            | 2.77233800  | -4.22620100  |
| C         | 0.40483300             | 1.90503800  | -1.64152000  |
| C         | 0.14203800             | 3.28862400  | -1.86357700  |
| C         | -0.10832000            | 3.68578400  | -3.20222600  |

|                                  |             |             |              |
|----------------------------------|-------------|-------------|--------------|
| C                                | 0.11787700  | 4.15406000  | -0.73552000  |
| C                                | 0.29998600  | 3.59068200  | 0.52348300   |
| C                                | 0.52744200  | 2.21704600  | 0.66011400   |
| H                                | -0.28539900 | 3.12223900  | -5.23412500  |
| H                                | 0.78446100  | -1.66418100 | -5.46672300  |
| H                                | 1.32098400  | -2.21164900 | -3.15432600  |
| H                                | -0.32359000 | 4.72478300  | -3.41997500  |
| H                                | 0.29110800  | 4.20937000  | 1.41284900   |
| H                                | 0.66718000  | 1.78324900  | 1.64360200   |
| N                                | 0.58645800  | 1.39351100  | -0.37688400  |
| N                                | 0.82428200  | -0.32481100 | -2.37266000  |
| C                                | -0.09097400 | 5.61318800  | -0.85545900  |
| C                                | -1.08033300 | 6.24503600  | -0.08886800  |
| C                                | 0.72010100  | 6.39325300  | -1.69286700  |
| C                                | -1.26638000 | 7.62237200  | -0.17231800  |
| H                                | -1.71675600 | 5.65060400  | 0.56012200   |
| C                                | 0.53976800  | 7.77205400  | -1.76462700  |
| H                                | 1.50899500  | 5.92104100  | -2.27051000  |
| C                                | -0.45670400 | 8.38940000  | -1.00936200  |
| H                                | -2.04495400 | 8.09591200  | 0.41783900   |
| H                                | 1.18208000  | 8.36399900  | -2.40938100  |
| H                                | -0.59952900 | 9.46396900  | -1.07050700  |
| C                                | -0.19662200 | 0.67034600  | -6.45493700  |
| C                                | -1.36897900 | 1.38943000  | -6.76362000  |
| C                                | 0.55946900  | 0.15883200  | -7.52862300  |
| C                                | -1.75547400 | 1.60046400  | -8.08339900  |
| H                                | -2.00079500 | 1.75511600  | -5.95985200  |
| C                                | 0.17384700  | 0.37585600  | -8.84722200  |
| H                                | 1.47295800  | -0.39209000 | -7.32423000  |
| C                                | -0.98462200 | 1.10003900  | -9.13346500  |
| H                                | -2.66961400 | 2.14878600  | -8.29157600  |
| H                                | 0.78356100  | -0.01789800 | -9.65526600  |
| H                                | -1.28599900 | 1.26765700  | -10.16304200 |
| C                                | -3.90528300 | -1.82750200 | -0.46350200  |
| C                                | -2.94460400 | -2.79924800 | -0.20873900  |
| C                                | -1.60567900 | -2.43372700 | -0.11868500  |
| C                                | -2.15284200 | -0.20796100 | -0.53977200  |
| C                                | -3.50206700 | -0.50632700 | -0.62629200  |
| H                                | -4.95222100 | -2.10038000 | -0.53425400  |
| H                                | -3.22483000 | -3.83698600 | -0.07305400  |
| H                                | -1.80095400 | 0.80600700  | -0.67224300  |
| H                                | -4.21254800 | 0.28655600  | -0.82540300  |
| N                                | -1.21490600 | -1.14486300 | -0.29589100  |
| C                                | -0.57055300 | -3.45162300 | 0.24889700   |
| S                                | 1.02057000  | -3.09011800 | -0.57848600  |
| C                                | 2.19781200  | -3.81885000 | 0.58915600   |
| H                                | 3.19492700  | -3.57461400 | 0.21954400   |
| H                                | 2.05916900  | -3.42357500 | 1.59582700   |
| H                                | 2.06211300  | -4.90101900 | 0.57975800   |
| H                                | -0.39379500 | -3.42975400 | 1.32922800   |
| H                                | -0.89034600 | -4.45905300 | -0.02030700  |
| <b>Tb</b> E=-2347.453275 Hartree |             |             |              |
| Ru                               | 0.77100700  | -0.73547100 | -0.29058400  |
| C                                | 3.37549300  | -0.29861500 | 0.97877000   |
| C                                | 3.54205600  | -0.04070600 | -1.37458700  |
| C                                | 4.88439600  | 0.25817000  | -1.30714900  |
| C                                | 5.50059200  | 0.27876600  | -0.03141700  |

|   |             |             |             |
|---|-------------|-------------|-------------|
| C | 4.75859200  | 0.00764700  | 1.08966700  |
| C | 2.50583900  | -0.57457400 | 2.06414600  |
| C | 0.26722600  | -1.05002500 | 2.71636400  |
| C | 0.60823200  | -1.13268200 | 4.04408700  |
| C | 1.97221400  | -0.94604900 | 4.39958800  |
| C | 2.89735000  | -0.67284200 | 3.42664300  |
| H | 3.02450800  | -0.07470000 | -2.32715400 |
| H | 5.43877400  | 0.46507800  | -2.21424400 |
| H | 6.55555600  | 0.51479700  | 0.06112000  |
| H | 5.22209900  | 0.03646500  | 2.06863700  |
| H | -0.76205700 | -1.17423000 | 2.39587400  |
| H | -0.15436500 | -1.33019300 | 4.78725200  |
| H | 2.28093000  | -1.02121500 | 5.43682100  |
| H | 3.93928100  | -0.53667100 | 3.69121300  |
| N | 1.16546400  | -0.78391200 | 1.73817300  |
| N | 2.80073100  | -0.32579000 | -0.28461500 |
| C | 0.04240900  | -0.96459900 | -4.67529600 |
| C | -0.08287000 | 0.36455400  | -5.05528300 |
| C | -0.00703900 | 1.35292000  | -4.02940000 |
| C | 0.24108700  | 0.91871500  | -2.71041600 |
| C | 0.27638600  | -1.30589600 | -3.34277100 |
| C | -0.21869800 | 2.75180800  | -4.24562700 |
| C | 0.32930700  | 1.86884700  | -1.64159400 |
| C | 0.18866900  | 3.24932000  | -1.89381400 |
| C | -0.12236800 | 3.65483800  | -3.23044400 |
| C | 0.30872900  | 4.14564100  | -0.79026100 |
| C | 0.50402300  | 3.59417900  | 0.46900600  |
| C | 0.61311000  | 2.21297100  | 0.63410200  |
| H | -0.48242100 | 3.09396100  | -5.23844000 |
| H | -0.00677600 | -1.75541100 | -5.41422900 |
| H | 0.39898300  | -2.34446300 | -3.05733600 |
| H | -0.31006100 | 4.70236500  | -3.43000600 |
| H | 0.60204900  | 4.23203700  | 1.33924600  |
| H | 0.77534300  | 1.77793100  | 1.61314300  |
| N | 0.53414900  | 1.37054500  | -0.39144200 |
| N | 0.39069300  | -0.39552000 | -2.38003800 |
| C | 0.23333600  | 5.61281800  | -0.94237100 |
| C | -0.63194000 | 6.35477800  | -0.12564200 |
| C | 1.05006800  | 6.28737000  | -1.86208600 |
| C | -0.69204200 | 7.74056600  | -0.24016900 |
| H | -1.27370500 | 5.84161800  | 0.58433200  |
| C | 0.99689100  | 7.67470300  | -1.96313500 |
| H | 1.74654600  | 5.72776100  | -2.47925900 |
| C | 0.12248300  | 8.40342400  | -1.15752200 |
| H | -1.37624400 | 8.30203000  | 0.38820600  |
| H | 1.64231000  | 8.18574200  | -2.67056100 |
| H | 0.07797600  | 9.48475400  | -1.24261600 |
| C | -0.28628300 | 0.70298600  | -6.47854500 |
| C | -1.29829500 | 0.06383500  | -7.20892400 |
| C | 0.54951500  | 1.62215900  | -7.13000100 |
| C | -1.48167200 | 0.35233200  | -8.55811900 |
| H | -1.95508400 | -0.64404400 | -6.71209800 |
| C | 0.37156800  | 1.89673500  | -8.48305800 |
| H | 1.35633000  | 2.10175900  | -6.58386300 |
| C | -0.64688300 | 1.26761100  | -9.19825600 |
| H | -2.27773100 | -0.13895600 | -9.10874200 |
| H | 1.03232200  | 2.60110700  | -8.97847600 |

|                                  |             |             |              |
|----------------------------------|-------------|-------------|--------------|
| H                                | -0.78773300 | 1.48812200  | -10.25184200 |
| C                                | -4.00239000 | -2.05601100 | -0.28570300  |
| C                                | -3.00448400 | -2.99201100 | -0.03676600  |
| C                                | -1.67659600 | -2.57990300 | 0.00773800   |
| C                                | -2.30187400 | -0.39073000 | -0.45735300  |
| C                                | -3.64536900 | -0.72840200 | -0.49375800  |
| H                                | -5.04186000 | -2.36256400 | -0.31950200  |
| H                                | -3.24791800 | -4.03493000 | 0.12921800   |
| H                                | -1.98499800 | 0.63053800  | -0.62860000  |
| H                                | -4.38521500 | 0.03748600  | -0.69169400  |
| N                                | -1.33140100 | -1.28967700 | -0.21127400  |
| C                                | -0.60005100 | -3.55694200 | 0.37502500   |
| S                                | 0.99180700  | -3.12251500 | -0.40842600  |
| C                                | 2.18059800  | -3.76681500 | 0.79384900   |
| H                                | 3.16699700  | -3.45001200 | 0.45268700   |
| H                                | 1.98073700  | -3.37408500 | 1.79050400   |
| H                                | 2.11810400  | -4.85560000 | 0.78078900   |
| H                                | -0.44345300 | -3.54793900 | 1.45861000   |
| H                                | -0.86465400 | -4.57258100 | 0.07774800   |
| <b>Tc</b> E=-2347.471403 Hartree |             |             |              |
| Ru                               | 1.17541200  | -0.58404700 | -0.27411700  |
| C                                | 3.80212400  | -0.39101000 | 1.53015800   |
| C                                | 4.46336400  | -0.18037000 | -0.68059700  |
| C                                | 5.81101800  | -0.16249400 | -0.33533200  |
| C                                | 6.14352100  | -0.27333500 | 1.01090300   |
| C                                | 5.13163400  | -0.38781200 | 1.95862000   |
| C                                | 2.64671700  | -0.48871900 | 2.45391800   |
| C                                | 0.33120100  | -0.67089100 | 2.66159300   |
| C                                | 0.39741800  | -0.63923800 | 4.04730300   |
| C                                | 1.64822000  | -0.53183800 | 4.64594700   |
| C                                | 2.77936500  | -0.45343000 | 3.84283500   |
| H                                | 4.14370400  | -0.10114500 | -1.71605000  |
| H                                | 6.57095700  | -0.06672000 | -1.10204700  |
| H                                | 7.18136700  | -0.27078900 | 1.32580300   |
| H                                | 5.38639200  | -0.47853500 | 3.00695800   |
| H                                | -0.61783500 | -0.75758100 | 2.14133500   |
| H                                | -0.51233000 | -0.69937400 | 4.63238200   |
| H                                | 1.74589100  | -0.50447200 | 5.72542900   |
| H                                | 3.75551500  | -0.35648700 | 4.29978000   |
| N                                | 1.42368100  | -0.60235400 | 1.88346200   |
| N                                | 3.49190000  | -0.29609100 | 0.22567600   |
| C                                | -0.10131800 | -1.00481100 | -4.50222800  |
| C                                | -0.42107400 | 0.29232000  | -4.87760100  |
| C                                | -0.20684300 | 1.32696300  | -3.92121800  |
| C                                | 0.32171500  | 0.96754700  | -2.66277500  |
| C                                | 0.41104200  | -1.27146800 | -3.23263800  |
| C                                | -0.54802100 | 2.70050600  | -4.13847000  |
| C                                | 0.55704400  | 1.96839800  | -1.66533500  |
| C                                | 0.29301700  | 3.32809000  | -1.93791300  |
| C                                | -0.30435500 | 3.65405600  | -3.19752700  |
| C                                | 0.58432300  | 4.28293600  | -0.92054100  |
| C                                | 1.06514800  | 3.80375200  | 0.29042900   |
| C                                | 1.26998400  | 2.43686400  | 0.48319800   |
| H                                | -1.02602600 | 2.98051100  | -5.06887900  |
| H                                | -0.23309300 | -1.82656400 | -5.19614400  |
| H                                | 0.66617000  | -2.28634600 | -2.94954800  |
| H                                | -0.59000400 | 4.68036700  | -3.39221700  |

|           |                        |             |             |
|-----------|------------------------|-------------|-------------|
| H         | 1.30676900             | 4.48789500  | 1.09533600  |
| H         | 1.64622800             | 2.06519900  | 1.42937000  |
| N         | 1.03175500             | 1.53511400  | -0.46434800 |
| N         | 0.61257600             | -0.32193100 | -2.32212900 |
| C         | 0.39547100             | 5.73649700  | -1.11091200 |
| C         | -0.33535400            | 6.47538200  | -0.16981400 |
| C         | 0.97608200             | 6.40469600  | -2.19903800 |
| C         | -0.49618400            | 7.84959000  | -0.32348500 |
| H         | -0.79487300            | 5.96689200  | 0.67263300  |
| C         | 0.82390000             | 7.78111100  | -2.34229800 |
| H         | 1.56832500             | 5.84935000  | -2.92026800 |
| C         | 0.08360600             | 8.50565600  | -1.40878000 |
| H         | -1.07569800            | 8.40727900  | 0.40564900  |
| H         | 1.28784600             | 8.28729800  | -3.18307900 |
| H         | -0.03889500            | 9.57804800  | -1.52532300 |
| C         | -0.97221700            | 0.54706700  | -6.22489700 |
| C         | -2.08746700            | -0.18058000 | -6.66343500 |
| C         | -0.37825200            | 1.47495700  | -7.09247100 |
| C         | -2.60774300            | 0.02828700  | -7.93762000 |
| H         | -2.55774700            | -0.89558100 | -5.99432600 |
| C         | -0.89399600            | 1.67166400  | -8.37066700 |
| H         | 0.50240100             | 2.02514500  | -6.77454400 |
| C         | -2.01188300            | 0.95348200  | -8.79404900 |
| H         | -3.47934200            | -0.53250500 | -8.26055400 |
| H         | -0.41894900            | 2.38526400  | -9.03662900 |
| H         | -2.41587400            | 1.11269100  | -9.78906800 |
| C         | -3.22889000            | -2.16924000 | -2.31263400 |
| C         | -2.39968100            | -3.05052700 | -1.62045900 |
| C         | -1.57882500            | -2.54524300 | -0.61366200 |
| C         | -2.36247900            | -0.40910000 | -0.95056900 |
| C         | -3.21715700            | -0.82086800 | -1.97102800 |
| H         | -3.87123400            | -2.53335900 | -3.10778100 |
| H         | -2.38653500            | -4.10816900 | -1.86072100 |
| H         | -2.31262300            | 0.63810400  | -0.65950300 |
| H         | -3.84645100            | -0.10099900 | -2.48223000 |
| N         | -1.55188500            | -1.24092700 | -0.29073200 |
| C         | -0.64054800            | -3.42834000 | 0.15695300  |
| S         | 1.10204600             | -3.03170100 | -0.28651000 |
| C         | 1.98058700             | -3.76281000 | 1.11840800  |
| H         | 3.03595200             | -3.51464700 | 0.99511700  |
| H         | 1.60936700             | -3.36510900 | 2.06380000  |
| H         | 1.85515300             | -4.84585500 | 1.08384100  |
| H         | -0.74613000            | -3.25449900 | 1.23081700  |
| H         | -0.79976800            | -4.48654300 | -0.05486200 |
| <b>Td</b> | E=-2347.474251 Hartree |             |             |
| Ru        | 0.76758600             | -0.69887500 | -0.16950800 |
| C         | 3.45811000             | -0.48992400 | 1.09142000  |
| C         | 3.59734400             | 0.03059600  | -1.17573700 |
| C         | 4.97492700             | 0.18348500  | -1.10726300 |
| C         | 5.60472500             | -0.01922200 | 0.11641100  |
| C         | 4.83973100             | -0.35687200 | 1.22634200  |
| C         | 2.55401400             | -0.81335500 | 2.20675500  |
| C         | 0.34186100             | -1.18900000 | 2.84330400  |
| C         | 0.69240300             | -1.30534700 | 4.18013500  |
| C         | 2.03443300             | -1.18521200 | 4.52640100  |
| C         | 2.97111400             | -0.93093200 | 3.53224100  |
| H         | 3.06212700             | 0.17417500  | -2.10726200 |



|   |             |             |              |
|---|-------------|-------------|--------------|
| H | 5.53209200  | 0.45272400  | -1.99647300  |
| H | 6.67980000  | 0.08502800  | 0.20991700   |
| H | 5.32035300  | -0.51665600 | 2.18288700   |
| H | -0.69178700 | -1.27218900 | 2.52647100   |
| H | -0.07410800 | -1.48803700 | 4.92337700   |
| H | 2.35056400  | -1.27696500 | 5.55931400   |
| H | 4.01453500  | -0.81341200 | 3.79421400   |
| N | 1.24471500  | -0.96621300 | 1.87344800   |
| N | 2.85529100  | -0.30263000 | -0.10977200  |
| C | 0.05261800  | -0.82811000 | -4.55663800  |
| C | -0.09737400 | 0.48605300  | -4.97029000  |
| C | -0.03713400 | 1.50011600  | -3.97108000  |
| C | 0.21734700  | 1.11519600  | -2.63258300  |
| C | 0.29055000  | -1.12063500 | -3.21382900  |
| C | -0.27193000 | 2.88454800  | -4.25159100  |
| C | 0.29732000  | 2.12727900  | -1.60307100  |
| C | 0.13391700  | 3.49430300  | -1.93187000  |
| C | -0.18848800 | 3.83604100  | -3.28286100  |
| C | 0.24651200  | 4.45006800  | -0.87897900  |
| C | 0.46262100  | 3.97498600  | 0.40646100   |
| C | 0.59185800  | 2.60021300  | 0.63089600   |
| H | -0.54186900 | 3.17346900  | -5.25973200  |
| H | 0.01710400  | -1.64088800 | -5.27261500  |
| H | 0.42901200  | -2.14899400 | -2.90168600  |
| H | -0.39262800 | 4.87019500  | -3.53191800  |
| H | 0.55751600  | 4.66358900  | 1.23833900   |
| H | 0.77128100  | 2.21754400  | 1.63266800   |
| N | 0.51988700  | 1.70500800  | -0.33994200  |
| N | 0.38473200  | -0.18900500 | -2.26817700  |
| C | 0.14328600  | 5.90803000  | -1.11094000  |
| C | -0.74821600 | 6.67540200  | -0.34835300  |
| C | 0.95960900  | 6.55126200  | -2.05262800  |
| C | -0.83247600 | 8.05265900  | -0.53468000  |
| H | -1.38908000 | 6.18696600  | 0.37985700   |
| C | 0.88083400  | 7.93024400  | -2.22888500  |
| H | 1.67296500  | 5.97283500  | -2.63230200  |
| C | -0.01808300 | 8.68347900  | -1.47437500  |
| H | -1.53582400 | 8.63243800  | 0.05508700   |
| H | 1.52565000  | 8.41589400  | -2.95479600  |
| H | -0.08188600 | 9.75792200  | -1.61677700  |
| C | -0.30896000 | 0.78077500  | -6.40414100  |
| C | -1.33115900 | 0.12707900  | -7.10624800  |
| C | 0.52959900  | 1.66913100  | -7.09308000  |
| C | -1.52106300 | 0.36965200  | -8.46398700  |
| H | -1.98934800 | -0.55869700 | -6.58087700  |
| C | 0.34457800  | 1.89980200  | -8.45363200  |
| H | 1.34180400  | 2.16239600  | -6.56728500  |
| C | -0.68342100 | 1.25518800  | -9.14096600  |
| H | -2.32461000 | -0.13410400 | -8.99230200  |
| H | 1.00733900  | 2.58203000  | -8.97688000  |
| H | -0.82945800 | 1.44079700  | -10.20063100 |
| C | -3.94114100 | -2.25551300 | -0.41737400  |
| C | -2.93222900 | -3.16530900 | -0.12132300  |
| C | -1.61789900 | -2.72340500 | 0.01848700   |
| C | -2.28039200 | -0.54426400 | -0.44083900  |
| C | -3.61038300 | -0.91419500 | -0.57133500  |
| H | -4.96676500 | -2.59125800 | -0.52489800  |

|   |             |             |             |
|---|-------------|-------------|-------------|
| H | -3.15757500 | -4.21715500 | 0.01127900  |
| H | -1.97918400 | 0.48945900  | -0.56838300 |
| H | -4.35755300 | -0.16321700 | -0.79848000 |
| N | -1.29842800 | -1.41960000 | -0.15884600 |
| C | -0.54569900 | -3.69117400 | 0.43428900  |
| S | 0.94556700  | -3.60749000 | -0.61993400 |
| C | 2.17342900  | -4.28675000 | 0.52365200  |
| H | 3.13131400  | -4.26125000 | 0.00134200  |
| H | 2.23909900  | -3.67909700 | 1.42896200  |
| H | 1.92899700  | -5.31920000 | 0.77939800  |
| H | -0.23096800 | -3.46992400 | 1.45902700  |
| H | -0.93661900 | -4.70946300 | 0.42372700  |

**Table S6**

| PATH TRIPLET Tc           |             |             |             |
|---------------------------|-------------|-------------|-------------|
| Tc E=-2423.873867 Hartree |             |             |             |
| Ru                        | 0.52122000  | -1.04899300 | 1.09505900  |
| N                         | -2.85300300 | -2.32441400 | 0.38355100  |
| O                         | -2.55646600 | -0.40336900 | 2.52163700  |
| C                         | 5.07144700  | -0.96471300 | 0.23360500  |
| C                         | 5.62064100  | -1.15017400 | 1.49815300  |
| C                         | 4.78290900  | -1.20439700 | 2.60729300  |
| C                         | 2.42492000  | -1.09709400 | 3.53289900  |
| C                         | 0.17584600  | -1.07685900 | 4.14999800  |
| C                         | 0.49403700  | -1.09348300 | 5.50157500  |
| C                         | 1.83472600  | -1.11783000 | 5.86811800  |
| C                         | 2.80635900  | -1.11304900 | 4.87501300  |
| H                         | 3.20308800  | -0.71007200 | -0.83073700 |
| H                         | 5.69174600  | -0.91200400 | -0.65341000 |
| H                         | 6.69282500  | -1.25233500 | 1.62514800  |
| H                         | 5.20648700  | -1.35397900 | 3.59219000  |
| H                         | -0.85527600 | -1.03486200 | 3.80713400  |
| H                         | -0.29889300 | -1.08549400 | 6.23992900  |
| H                         | 2.12564400  | -1.13132300 | 6.91264100  |
| H                         | 3.85306700  | -1.11112900 | 5.14970700  |
| N                         | 1.11434500  | -1.08858800 | 3.18796000  |
| N                         | 2.88359600  | -0.90851300 | 1.19302300  |
| C                         | -0.81063800 | -1.45327800 | -3.11003700 |
| C                         | -1.09819500 | -0.15009300 | -3.49079900 |
| C                         | -0.87836800 | 0.87915300  | -2.52978600 |
| C                         | -0.37531200 | 0.50916800  | -1.26390600 |
| C                         | -0.33308000 | -1.73130100 | -1.83015700 |
| C                         | -1.16912500 | 2.26294700  | -2.75669300 |
| C                         | -0.07512000 | 1.51111800  | -0.28527600 |
| C                         | -0.27298100 | 2.87796800  | -0.57474400 |
| C                         | -0.87778000 | 3.21520100  | -1.82798500 |
| C                         | 0.10221900  | 3.83196100  | 0.41604600  |
| C                         | 0.58897900  | 3.34780200  | 1.62315000  |
| C                         | 0.73301500  | 1.97560700  | 1.83225000  |
| H                         | -1.64083400 | 2.55284500  | -3.68735000 |
| H                         | -0.94201200 | -2.27253700 | -3.80705400 |
| H                         | -0.10397200 | -2.75133100 | -1.54566400 |
| H                         | -1.12180400 | 4.25063900  | -2.03085800 |
| H                         | 0.89172900  | 4.03153200  | 2.40744900  |
| H                         | 1.12470000  | 1.59711100  | 2.76968000  |
| N                         | 0.42060800  | 1.07365300  | 0.90589000  |
| N                         | -0.13183700 | -0.78770500 | -0.91288700 |
| C                         | 0.00501300  | 5.29036100  | 0.19750500  |
| C                         | -0.64089800 | 6.09921200  | 1.14312300  |
| C                         | 0.59779600  | 5.89218700  | -0.92250100 |
| C                         | -0.70739700 | 7.47797300  | 0.96277900  |
| H                         | -1.10830500 | 5.64287200  | 2.01069300  |
| C                         | 0.54057300  | 7.27270200  | -1.09244800 |
| H                         | 1.12681300  | 5.28099600  | -1.64763100 |
| C                         | -0.11612500 | 8.06785800  | -0.15384600 |
| H                         | -1.22164700 | 8.09131900  | 1.69609200  |
| H                         | 1.01358200  | 7.72644500  | -1.95775300 |
| H                         | -0.16444900 | 9.14373500  | -0.29094900 |
| C                         | -1.60408800 | 0.11502000  | -4.85373200 |

|                                               |             |             |             |
|-----------------------------------------------|-------------|-------------|-------------|
| C                                             | -2.71085100 | -0.60042100 | -5.33240700 |
| C                                             | -0.96830900 | 1.03439000  | -5.70078700 |
| C                                             | -3.18244500 | -0.38742900 | -6.62459700 |
| H                                             | -3.21257400 | -1.31124100 | -4.68202300 |
| C                                             | -1.43494600 | 1.23480200  | -6.99716100 |
| H                                             | -0.09188500 | 1.57325000  | -5.35334600 |
| C                                             | -2.54507500 | 0.52918000  | -7.46008700 |
| H                                             | -4.04793600 | -0.93906300 | -6.97821000 |
| H                                             | -0.92662400 | 1.94065700  | -7.64658200 |
| H                                             | -2.91008300 | 0.69078500  | -8.46969000 |
| C                                             | -3.36322800 | -4.00485100 | -1.77596100 |
| C                                             | -2.53225800 | -4.41791900 | -0.73797200 |
| C                                             | -2.30275900 | -3.54569400 | 0.32826500  |
| C                                             | -3.64880600 | -1.93659300 | -0.61654800 |
| C                                             | -3.93608500 | -2.73782400 | -1.71861400 |
| H                                             | -3.55950400 | -4.66411100 | -2.61507500 |
| H                                             | -2.06996200 | -5.39941100 | -0.75155700 |
| H                                             | -4.07334900 | -0.93926500 | -0.53010000 |
| H                                             | -4.59136900 | -2.37633300 | -2.50347900 |
| C                                             | 3.68891200  | -0.85074400 | 0.13093600  |
| C                                             | -1.40433600 | -3.93301700 | 1.46670900  |
| S                                             | 0.35260800  | -3.49958200 | 1.10900300  |
| C                                             | 1.14358200  | -4.22857100 | 2.56702300  |
| H                                             | 2.20257000  | -3.97174500 | 2.51806800  |
| H                                             | 0.70461700  | -3.84173700 | 3.48746400  |
| H                                             | 1.02957700  | -5.31226900 | 2.51471800  |
| H                                             | -1.69705200 | -3.42153900 | 2.38561400  |
| H                                             | -1.41225300 | -5.01274700 | 1.63040800  |
| C                                             | 3.40482400  | -1.07329600 | 2.42177100  |
| H                                             | -2.61646400 | -1.04814400 | 1.78390300  |
| H                                             | -2.22063200 | 0.39766700  | 2.10139500  |
| <b>TS<sub>1c</sub></b> E=-2423.870206 Hartree |             |             |             |
| Ru                                            | -0.86441200 | 0.92746300  | 0.32175400  |
| N                                             | -4.23359200 | -0.42305600 | -0.46463700 |
| O                                             | -3.96914900 | 2.18674600  | 0.71550500  |
| C                                             | 3.69923100  | 1.07721000  | -0.49533800 |
| C                                             | 4.24228800  | 0.99668300  | 0.78281900  |
| C                                             | 3.39538800  | 0.94972600  | 1.88516000  |
| C                                             | 1.02260000  | 0.94501500  | 2.78013300  |
| C                                             | -1.22226400 | 0.84555700  | 3.38174700  |
| C                                             | -0.92294900 | 0.86978000  | 4.73597200  |
| C                                             | 0.41389100  | 0.93475300  | 5.11248300  |
| C                                             | 1.39104300  | 0.97223000  | 4.12646100  |
| H                                             | 1.83233700  | 1.16050500  | -1.58931300 |
| H                                             | 4.32652300  | 1.11958400  | -1.37796800 |
| H                                             | 5.31696200  | 0.97048400  | 0.92587100  |
| H                                             | 3.81617400  | 0.88216700  | 2.88008000  |
| H                                             | -2.25228300 | 0.78414400  | 3.04740600  |
| H                                             | -1.72270700 | 0.83601000  | 5.46575700  |
| H                                             | 0.69597200  | 0.95644800  | 6.15911500  |
| H                                             | 2.43365900  | 1.02855600  | 4.41017400  |
| N                                             | -0.28382400 | 0.88409000  | 2.42242700  |
| N                                             | 1.50069200  | 1.04900900  | 0.43890600  |
| C                                             | -2.19559500 | 0.51694600  | -3.88369000 |
| C                                             | -2.43392600 | 1.82539000  | -4.28035500 |
| C                                             | -2.17267300 | 2.85760800  | -3.33303700 |
| C                                             | -1.68000200 | 2.48502700  | -2.06393500 |

|   |             |             |             |
|---|-------------|-------------|-------------|
| C | -1.72607200 | 0.23755900  | -2.60116700 |
| C | -2.41491700 | 4.24828200  | -3.57554100 |
| C | -1.34481300 | 3.48589500  | -1.09601300 |
| C | -1.49848500 | 4.85500800  | -1.39952600 |
| C | -2.09068200 | 5.19954700  | -2.65699200 |
| C | -1.09794700 | 5.80650700  | -0.41650000 |
| C | -0.63077300 | 5.31920900  | 0.79665900  |
| C | -0.52969500 | 3.94476800  | 1.01787400  |
| H | -2.87723100 | 4.54428000  | -4.50897800 |
| H | -2.36026500 | -0.30561300 | -4.56966300 |
| H | -1.53757800 | -0.78709000 | -2.30348400 |
| H | -2.29907100 | 6.24058400  | -2.87085100 |
| H | -0.31075800 | 6.00044700  | 1.57631700  |
| H | -0.15362400 | 3.56507300  | 1.96119700  |
| N | -0.86505200 | 3.04537900  | 0.09869600  |
| N | -1.48471400 | 1.18485800  | -1.69786100 |
| C | -1.15105000 | 7.26528800  | -0.64854000 |
| C | -1.77890200 | 8.10100400  | 0.28570500  |
| C | -0.53469100 | 7.83966100  | -1.77012900 |
| C | -1.80445600 | 9.47947200  | 0.09287600  |
| H | -2.26435100 | 7.66602000  | 1.15434000  |
| C | -0.55119900 | 9.21967900  | -1.95284200 |
| H | -0.01979700 | 7.20673700  | -2.48673100 |
| C | -1.19001700 | 10.04198500 | -1.02535100 |
| H | -2.30505800 | 10.11390100 | 0.81767100  |
| H | -0.06051600 | 9.65171500  | -2.81944300 |
| H | -1.20655200 | 11.11749600 | -1.17247400 |
| C | -2.93384700 | 2.09192400  | -5.64533100 |
| C | -4.06592400 | 1.40973500  | -6.11334700 |
| C | -2.26917000 | 2.97893400  | -6.50462500 |
| C | -4.53363500 | 1.62424500  | -7.40670200 |
| H | -4.59008700 | 0.72400500  | -5.45380000 |
| C | -2.73237600 | 3.18081100  | -7.80201800 |
| H | -1.37379000 | 3.49122100  | -6.16543100 |
| C | -3.86757600 | 2.50891500  | -8.25415100 |
| H | -5.41860800 | 1.09878700  | -7.75187100 |
| H | -2.20188200 | 3.86132600  | -8.46069500 |
| H | -4.22988400 | 2.67184600  | -9.26452400 |
| C | -4.73694900 | -2.21221600 | -2.53998500 |
| C | -3.91137200 | -2.57152700 | -1.47821100 |
| C | -3.68669600 | -1.64671200 | -0.45572500 |
| C | -5.02518800 | -0.08866800 | -1.48776900 |
| C | -5.31055300 | -0.94451800 | -2.54830900 |
| H | -4.92896100 | -2.91314800 | -3.34562200 |
| H | -3.44908700 | -3.55229600 | -1.43973200 |
| H | -5.44567100 | 0.91402000  | -1.45758100 |
| H | -5.96275800 | -0.62247000 | -3.35267200 |
| C | 2.31379900  | 1.10029800  | -0.61712300 |
| C | -2.79293100 | -1.98227100 | 0.70195200  |
| S | -1.04352400 | -1.52286900 | 0.34360100  |
| C | -0.23237100 | -2.24692800 | 1.79272300  |
| H | 0.81939600  | -1.96170600 | 1.74467800  |
| H | -0.67850400 | -1.88248200 | 2.71873100  |
| H | -0.31867000 | -3.33251900 | 1.72866800  |
| H | -3.10651700 | -1.45296300 | 1.60339200  |
| H | -2.77955300 | -3.05702300 | 0.89490600  |
| C | 2.01410100  | 0.98195600  | 1.67917100  |

|                                                 |             |             |             |
|-------------------------------------------------|-------------|-------------|-------------|
| H                                               | -3.97451500 | 1.23327300  | 0.49443600  |
| H                                               | -3.51662400 | 2.23767700  | 1.56434600  |
| <b>Tc-H<sub>2</sub>O</b> E=-2500.264234 Hartree |             |             |             |
| Ru                                              | 0.47589400  | -0.74647800 | 1.38439900  |
| N                                               | -3.03763500 | -2.36996100 | 0.04216800  |
| O                                               | -1.68824000 | -0.71049700 | 1.70658200  |
| C                                               | 4.56441200  | -0.23471700 | -0.06231300 |
| C                                               | 5.32105100  | -0.41471000 | 1.09193700  |
| C                                               | 4.67761100  | -0.71378100 | 2.28588200  |
| C                                               | 2.51238500  | -1.17423900 | 3.50401200  |
| C                                               | 0.38114200  | -1.51158300 | 4.37612700  |
| C                                               | 0.88632100  | -1.82990500 | 5.62790200  |
| C                                               | 2.26577700  | -1.81316300 | 5.80931100  |
| C                                               | 3.08482300  | -1.48263500 | 4.73740300  |
| H                                               | 2.55316000  | -0.21232700 | -0.84326800 |
| H                                               | 5.02512100  | -0.00296000 | -1.01494200 |
| H                                               | 6.40100000  | -0.32317000 | 1.06535700  |
| H                                               | 5.25616300  | -0.85225100 | 3.19004000  |
| H                                               | -0.68665100 | -1.52047100 | 4.19365300  |
| H                                               | 0.20807000  | -2.08587900 | 6.43279500  |
| H                                               | 2.70161200  | -2.05776000 | 6.77135300  |
| H                                               | 4.15972100  | -1.47437600 | 4.86291500  |
| N                                               | 1.16461200  | -1.18916100 | 3.33561000  |
| N                                               | 2.55923700  | -0.64424000 | 1.17697600  |
| C                                               | -0.73713900 | -1.20255300 | -2.83164400 |
| C                                               | -0.99626100 | 0.07476800  | -3.30599500 |
| C                                               | -0.80429400 | 1.16428400  | -2.40662500 |
| C                                               | -0.32565200 | 0.88367600  | -1.10547700 |
| C                                               | -0.30164800 | -1.39169600 | -1.52021500 |
| C                                               | -1.10884000 | 2.52447400  | -2.73747700 |
| C                                               | -0.04514500 | 1.96731800  | -0.19244000 |
| C                                               | -0.27098700 | 3.30605700  | -0.58874000 |
| C                                               | -0.85772700 | 3.54461400  | -1.87228400 |
| C                                               | 0.06323300  | 4.33798300  | 0.33772800  |
| C                                               | 0.54688700  | 3.95929600  | 1.58186300  |
| C                                               | 0.72455000  | 2.60360200  | 1.88129500  |
| H                                               | -1.56523400 | 2.73944100  | -3.69576500 |
| H                                               | -0.85967700 | -2.06667000 | -3.47411100 |
| H                                               | -0.10846700 | -2.38978300 | -1.14186700 |
| H                                               | -1.11814300 | 4.55790500  | -2.15294000 |
| H                                               | 0.81962100  | 4.70842600  | 2.31644800  |
| H                                               | 1.11972600  | 2.29515900  | 2.84590400  |
| N                                               | 0.44806200  | 1.63842700  | 1.02098900  |
| N                                               | -0.09853000 | -0.38695200 | -0.67258300 |
| C                                               | -0.07553500 | 5.77550200  | 0.01451700  |
| C                                               | -0.77842400 | 6.62384400  | 0.88126200  |
| C                                               | 0.53137600  | 6.32124100  | -1.12605200 |
| C                                               | -0.88498200 | 7.98441200  | 0.60504900  |
| H                                               | -1.25674900 | 6.21129300  | 1.76476000  |
| C                                               | 0.43253000  | 7.68414300  | -1.39357700 |
| H                                               | 1.10131700  | 5.68058700  | -1.79250300 |
| C                                               | -0.27927900 | 8.51803000  | -0.53188300 |
| H                                               | -1.44200300 | 8.62738000  | 1.27955800  |
| H                                               | 0.91615300  | 8.09414200  | -2.27483400 |
| H                                               | -0.35938000 | 9.57974200  | -0.74435000 |
| C                                               | -1.44844500 | 0.25449400  | -4.70241300 |

|                                               |             |             |             |
|-----------------------------------------------|-------------|-------------|-------------|
| C                                             | -2.53307000 | -0.49239300 | -5.18313800 |
| C                                             | -0.78032200 | 1.12335200  | -5.57754800 |
| C                                             | -2.95267800 | -0.35889700 | -6.50366900 |
| H                                             | -3.05764500 | -1.16726100 | -4.51318400 |
| C                                             | -1.19448100 | 1.24509100  | -6.90122700 |
| H                                             | 0.07960300  | 1.68644600  | -5.22726300 |
| C                                             | -2.28425300 | 0.50946400  | -7.36592100 |
| H                                             | -3.80226100 | -0.93438400 | -6.85801400 |
| H                                             | -0.66147900 | 1.91338500  | -7.57038300 |
| H                                             | -2.60908400 | 0.61020200  | -8.39693400 |
| C                                             | -4.06682200 | -3.98287200 | -1.96757700 |
| C                                             | -3.40193500 | -4.54377900 | -0.88119700 |
| C                                             | -2.90542100 | -3.70398000 | 0.11723700  |
| C                                             | -3.67828700 | -1.83572500 | -1.00203600 |
| C                                             | -4.21848600 | -2.60039000 | -2.03025800 |
| H                                             | -4.46619200 | -4.61826300 | -2.75126700 |
| H                                             | -3.27375600 | -5.61794800 | -0.80102000 |
| H                                             | -3.75311400 | -0.75083800 | -1.01399000 |
| H                                             | -4.74146100 | -2.12377100 | -2.85198100 |
| C                                             | 3.18563700  | -0.35186400 | 0.02520600  |
| C                                             | -2.19299400 | -4.25409700 | 1.31821100  |
| S                                             | -0.38590100 | -4.33443200 | 1.02639900  |
| C                                             | 0.14310200  | -4.91498600 | 2.65814100  |
| H                                             | 1.23049800  | -4.99404300 | 2.61346100  |
| H                                             | -0.13650800 | -4.19854000 | 3.43486100  |
| H                                             | -0.28902700 | -5.89334400 | 2.88009500  |
| H                                             | -2.37485700 | -3.61939300 | 2.18919600  |
| H                                             | -2.54497800 | -5.26343900 | 1.54442900  |
| C                                             | 3.28933800  | -0.83443900 | 2.30534600  |
| H                                             | -2.22195500 | -1.33090800 | 1.11401300  |
| H                                             | -2.04264100 | -0.81095700 | 2.60004100  |
| O                                             | 2.92025400  | -3.83251300 | 1.21383400  |
| H                                             | 3.59195300  | -3.81675200 | 0.52029700  |
| H                                             | 2.19444300  | -3.31920400 | 0.83930000  |
| <b>TS<sub>2c</sub></b> E=-2500.259707 Hartree |             |             |             |
| Ru                                            | 0.65857600  | -1.25464700 | 1.20053300  |
| N                                             | -3.07916500 | -1.73116500 | 0.07007200  |
| O                                             | -1.51150900 | -0.45145100 | 1.96896400  |
| C                                             | 4.80015500  | -0.57103800 | -0.27264400 |
| C                                             | 5.55521800  | -0.69873400 | 0.88903200  |
| C                                             | 4.91543800  | -0.96812200 | 2.09346800  |
| C                                             | 2.74744600  | -1.38932700 | 3.33122400  |
| C                                             | 0.63053100  | -1.70377000 | 4.23932100  |
| C                                             | 1.14076000  | -1.84898200 | 5.52065600  |
| C                                             | 2.51743400  | -1.76690000 | 5.69828000  |
| C                                             | 3.32477600  | -1.53339200 | 4.59278200  |
| H                                             | 2.78673000  | -0.62661500 | -1.05519000 |
| H                                             | 5.26013200  | -0.35797400 | -1.23008900 |
| H                                             | 6.63332600  | -0.58653400 | 0.86248600  |
| H                                             | 5.49769800  | -1.06065000 | 3.00105500  |
| H                                             | -0.43449500 | -1.77213700 | 4.05825400  |
| H                                             | 0.46670100  | -2.02564400 | 6.35009000  |
| H                                             | 2.95942400  | -1.87926100 | 6.68174100  |
| H                                             | 4.39735200  | -1.46180000 | 4.71738300  |
| N                                             | 1.40178400  | -1.48456200 | 3.16366100  |
| N                                             | 2.80503100  | -0.99098700 | 0.97532700  |
| C                                             | -0.48172600 | -1.66065500 | -3.03033300 |

|   |             |             |             |
|---|-------------|-------------|-------------|
| C | -0.81306000 | -0.38237400 | -3.45588900 |
| C | -0.69886200 | 0.67411400  | -2.50573000 |
| C | -0.20185500 | 0.37059000  | -1.21586500 |
| C | -0.06541700 | -1.88300800 | -1.71982800 |
| C | -1.10486500 | 2.02207900  | -2.77153300 |
| C | 0.04412600  | 1.43301900  | -0.27159500 |
| C | -0.28859800 | 2.76740200  | -0.60243000 |
| C | -0.92159900 | 3.01701000  | -1.86143500 |
| C | -0.00916100 | 3.78049300  | 0.36105000  |
| C | 0.54636600  | 3.38677900  | 1.56973400  |
| C | 0.84201900  | 2.03801600  | 1.79913000  |
| H | -1.58989600 | 2.24498000  | -3.71372800 |
| H | -0.53589400 | -2.50219600 | -3.71082700 |
| H | 0.17150800  | -2.88793700 | -1.38928800 |
| H | -1.26594000 | 4.01831500  | -2.08957700 |
| H | 0.78167300  | 4.12160000  | 2.33126400  |
| H | 1.29188700  | 1.72367200  | 2.73743500  |
| N | 0.60736600  | 1.09079700  | 0.90812000  |
| N | 0.07311700  | -0.90737300 | -0.82253000 |
| C | -0.28408400 | 5.21346900  | 0.11221400  |
| C | -1.04471400 | 5.94940400  | 1.03115800  |
| C | 0.24182000  | 5.86670900  | -1.01184800 |
| C | -1.28750300 | 7.30448400  | 0.82186900  |
| H | -1.46122900 | 5.45206800  | 1.90219900  |
| C | 0.00666700  | 7.22437200  | -1.21259000 |
| H | 0.85401400  | 5.31469400  | -1.71896500 |
| C | -0.76223700 | 7.94532200  | -0.29960300 |
| H | -1.88874600 | 7.85897000  | 1.53584700  |
| H | 0.42784300  | 7.71886700  | -2.08247000 |
| H | -0.94955500 | 9.00256800  | -0.46053500 |
| C | -1.25054400 | -0.17239400 | -4.85217900 |
| C | -2.23299400 | -1.00564900 | -5.40724300 |
| C | -0.66016700 | 0.81035100  | -5.66097700 |
| C | -2.63189000 | -0.84478400 | -6.73091300 |
| H | -2.69517900 | -1.77339000 | -4.79406200 |
| C | -1.05237100 | 0.96048900  | -6.98826500 |
| H | 0.12640000  | 1.44085800  | -5.25771200 |
| C | -2.04301800 | 0.13868500  | -7.52476800 |
| H | -3.40241200 | -1.48986800 | -7.14154200 |
| H | -0.57869500 | 1.71829600  | -7.60451100 |
| H | -2.35109500 | 0.26116800  | -8.55854200 |
| C | -3.88699400 | -3.20750200 | -2.14146300 |
| C | -3.30386600 | -3.83728400 | -1.04531900 |
| C | -2.92062600 | -3.06383100 | 0.05167500  |
| C | -3.63333400 | -1.13269000 | -0.98735200 |
| C | -4.06312600 | -1.82713300 | -2.11451900 |
| H | -4.20060100 | -3.78870100 | -3.00273200 |
| H | -3.15491800 | -4.91179800 | -1.03434100 |
| H | -3.73400100 | -0.05159000 | -0.92843600 |
| H | -4.51558300 | -1.29597300 | -2.94462800 |
| C | 3.42299800  | -0.72069300 | -0.18194900 |
| C | -2.31349900 | -3.69381900 | 1.27290200  |
| S | -0.47763100 | -3.72712400 | 1.18818600  |
| C | -0.12368700 | -4.64674300 | 2.70428800  |
| H | 0.96322000  | -4.67995600 | 2.78584600  |
| H | -0.55852100 | -4.15643500 | 3.57678100  |
| H | -0.51943000 | -5.65957900 | 2.60998800  |



|                                                             |             |             |             |
|-------------------------------------------------------------|-------------|-------------|-------------|
| H                                                           | -2.60880600 | -3.15309500 | 2.17442300  |
| H                                                           | -2.63058300 | -4.73456000 | 1.36777300  |
| C                                                           | 3.52792600  | -1.11380800 | 2.11262800  |
| H                                                           | -2.19018600 | -0.82369000 | 1.34676500  |
| H                                                           | -1.86333200 | -0.59929700 | 2.85673400  |
| O                                                           | 2.77455300  | -4.27821000 | 1.08584600  |
| H                                                           | 3.69752000  | -4.10044000 | 1.30759600  |
| H                                                           | 2.60994600  | -3.70265900 | 0.32871600  |
| <b><sup>3</sup>Ru-H<sub>2</sub>O</b> E=-2500.265379 Hartree |             |             |             |
| Ru                                                          | 0.44066900  | -0.95795500 | 1.07116400  |
| N                                                           | -3.08461500 | -1.95723200 | 0.16823500  |
| O                                                           | -2.10336500 | 0.12917100  | 1.84327700  |
| C                                                           | 4.99277300  | -0.93391200 | 0.21578500  |
| C                                                           | 5.52661300  | -1.25222500 | 1.46205700  |
| C                                                           | 4.68701000  | -1.32202900 | 2.56987000  |
| C                                                           | 2.34213100  | -1.08503200 | 3.50865300  |
| C                                                           | 0.10549500  | -0.96742000 | 4.13439100  |
| C                                                           | 0.42112100  | -1.01326700 | 5.48484200  |
| C                                                           | 1.76043400  | -1.10407000 | 5.84671400  |
| C                                                           | 2.72671200  | -1.13362100 | 4.84928000  |
| H                                                           | 3.14427600  | -0.47941000 | -0.81897900 |
| H                                                           | 5.61647800  | -0.86221700 | -0.66757600 |
| H                                                           | 6.58786000  | -1.44527100 | 1.57463600  |
| H                                                           | 5.09719500  | -1.57636000 | 3.53908600  |
| H                                                           | -0.92155600 | -0.89247000 | 3.79893600  |
| H                                                           | -0.36983200 | -0.97816600 | 6.22430100  |
| H                                                           | 2.05351700  | -1.14172100 | 6.88993500  |
| H                                                           | 3.77400900  | -1.17856000 | 5.11816300  |
| N                                                           | 1.03306400  | -1.01071100 | 3.16501100  |
| N                                                           | 2.81503800  | -0.79342200 | 1.18806900  |
| C                                                           | -0.78320000 | -1.37198900 | -3.16362800 |
| C                                                           | -1.08882800 | -0.07138300 | -3.54197700 |
| C                                                           | -0.88908700 | 0.95831200  | -2.57697500 |
| C                                                           | -0.37504400 | 0.59302000  | -1.31436800 |
| C                                                           | -0.31953000 | -1.64891900 | -1.87812800 |
| C                                                           | -1.21685900 | 2.33654600  | -2.79076100 |
| C                                                           | -0.07043100 | 1.59698300  | -0.33836700 |
| C                                                           | -0.31630600 | 2.95934500  | -0.61187900 |
| C                                                           | -0.94894800 | 3.28798400  | -1.85410100 |
| C                                                           | 0.03686600  | 3.91327600  | 0.38643100  |
| C                                                           | 0.57903800  | 3.43328100  | 1.57107400  |
| C                                                           | 0.77970800  | 2.06398300  | 1.75694500  |
| H                                                           | -1.70442800 | 2.62147300  | -3.71476700 |
| H                                                           | -0.89902500 | -2.19057500 | -3.86422100 |
| H                                                           | -0.09347600 | -2.66812000 | -1.58590400 |
| H                                                           | -1.22931000 | 4.31663600  | -2.04437100 |
| H                                                           | 0.87338400  | 4.11850300  | 2.35743100  |
| H                                                           | 1.20994000  | 1.68890600  | 2.67898000  |
| N                                                           | 0.46789500  | 1.16478500  | 0.83221800  |
| N                                                           | -0.13047000 | -0.70241800 | -0.96092200 |
| C                                                           | -0.15140900 | 5.36855900  | 0.20432700  |
| C                                                           | -0.83734500 | 6.10900500  | 1.17736000  |
| C                                                           | 0.38273800  | 6.03604100  | -0.90754400 |
| C                                                           | -1.00021900 | 7.48399800  | 1.03257600  |
| H                                                           | -1.26026100 | 5.60069800  | 2.03888900  |
| C                                                           | 0.22843400  | 7.41317800  | -1.04286000 |
| H                                                           | 0.94039600  | 5.47952800  | -1.65499700 |

|                                  |             |             |             |
|----------------------------------|-------------|-------------|-------------|
| C                                | -0.46726100 | 8.13931400  | -0.07688000 |
| H                                | -1.54459800 | 8.04274100  | 1.78757500  |
| H                                | 0.65579600  | 7.91869400  | -1.90322300 |
| H                                | -0.59151700 | 9.21219600  | -0.18706700 |
| C                                | -1.59659900 | 0.19167900  | -4.90473400 |
| C                                | -2.67561200 | -0.55564600 | -5.39813200 |
| C                                | -0.99299400 | 1.14570100  | -5.73721300 |
| C                                | -3.15344000 | -0.33938600 | -6.68738700 |
| H                                | -3.15150000 | -1.29525200 | -4.76101600 |
| C                                | -1.46546500 | 1.35043500  | -7.03076800 |
| H                                | -0.13654300 | 1.70994800  | -5.38054400 |
| C                                | -2.54958400 | 0.61371700  | -7.50672300 |
| H                                | -3.99814900 | -0.91627000 | -7.05085600 |
| H                                | -0.98237500 | 2.08473600  | -7.66781400 |
| H                                | -2.92006500 | 0.77938900  | -8.51367300 |
| C                                | -3.59606000 | -3.70791300 | -1.93472000 |
| C                                | -2.84279500 | -4.11817300 | -0.83849500 |
| C                                | -2.61269900 | -3.21234600 | 0.19952800  |
| C                                | -3.80404800 | -1.57118100 | -0.88917600 |
| C                                | -4.09331900 | -2.40840100 | -1.96323100 |
| H                                | -3.79323900 | -4.39474500 | -2.75125600 |
| H                                | -2.44307600 | -5.12531600 | -0.78320800 |
| H                                | -4.16302300 | -0.54490200 | -0.87425000 |
| H                                | -4.69119400 | -2.04820600 | -2.79323300 |
| C                                | 3.62080700  | -0.71556200 | 0.12901500  |
| C                                | -1.81746100 | -3.61274600 | 1.40902900  |
| S                                | -0.00541500 | -3.39430200 | 1.14573800  |
| C                                | 0.61920800  | -4.16776400 | 2.65843000  |
| H                                | 1.70530400  | -4.09772900 | 2.59889400  |
| H                                | 0.23999000  | -3.66506900 | 3.54852800  |
| H                                | 0.31846700  | -5.21683800 | 2.65545800  |
| H                                | -2.11458900 | -3.02746000 | 2.28054800  |
| H                                | -1.94912100 | -4.67502000 | 1.62690200  |
| C                                | 3.32293800  | -1.07396100 | 2.39865000  |
| H                                | -2.55084000 | -0.58200800 | 1.33088000  |
| H                                | -2.59525700 | 0.17728000  | 2.67284900  |
| O                                | 3.13598300  | -4.02368500 | 0.56948100  |
| H                                | 3.99003700  | -3.57418700 | 0.56562700  |
| H                                | 2.72955500  | -3.74101100 | -0.25907600 |
| <b>PATH_TRIPLET Td</b>           |             |             |             |
| <b>Td E=-2423.869255 Hartree</b> |             |             |             |
| Ru                               | 0.29186200  | -1.08847500 | 1.15763100  |
| C                                | 2.95023200  | -0.59964400 | 2.41381700  |
| C                                | 2.98225700  | 0.10433200  | 0.19475900  |
| C                                | 4.32361500  | 0.45190300  | 0.27001400  |
| C                                | 4.99260200  | 0.25247600  | 1.47333600  |
| C                                | 4.29975700  | -0.27571200 | 2.55555300  |
| C                                | 2.11861600  | -1.13277000 | 3.50489200  |
| C                                | -0.00971700 | -1.84678600 | 4.13133000  |
| C                                | 0.38466400  | -2.03706700 | 5.44713500  |
| C                                | 1.70700700  | -1.77227600 | 5.78757200  |
| C                                | 2.57880200  | -1.31131700 | 4.80893000  |
| H                                | 2.42128900  | 0.23509900  | -0.72360400 |
| H                                | 4.82341100  | 0.86411400  | -0.59823500 |
| H                                | 6.04217000  | 0.50558800  | 1.57231100  |
| H                                | 4.81140900  | -0.43340900 | 3.49611800  |
| H                                | -1.03059000 | -2.03951000 | 3.82331800  |

|   |             |             |             |
|---|-------------|-------------|-------------|
| H | -0.33400800 | -2.38603900 | 6.17865300  |
| H | 2.05692600  | -1.91334300 | 6.80397600  |
| H | 3.60521900  | -1.08570900 | 5.06728900  |
| N | 0.83123900  | -1.41831500 | 3.17572400  |
| N | 2.31121000  | -0.41241000 | 1.23346000  |
| C | -0.49655800 | -1.39673800 | -3.20661500 |
| C | -0.64645400 | -0.10005400 | -3.67329300 |
| C | -0.60170100 | 0.95234500  | -2.71348500 |
| C | -0.35553200 | 0.61837500  | -1.36058100 |
| C | -0.25484300 | -1.63509300 | -1.85340200 |
| C | -0.84239300 | 2.32478700  | -3.04424900 |
| C | -0.31615600 | 1.66242100  | -0.36324600 |
| C | -0.47949400 | 3.01648300  | -0.73947800 |
| C | -0.77657700 | 3.30991800  | -2.10775000 |
| C | -0.39251000 | 4.00531500  | 0.28472700  |
| C | -0.21382800 | 3.57056900  | 1.59052500  |
| C | -0.09141000 | 2.20378800  | 1.86287000  |
| H | -1.10050500 | 2.57736300  | -4.06520100 |
| H | -0.52986100 | -2.23745600 | -3.88970800 |
| H | -0.11854100 | -2.65005900 | -1.49920900 |
| H | -0.98049400 | 4.33393300  | -2.39592700 |
| H | -0.14070200 | 4.28513500  | 2.40251500  |
| H | 0.05941000  | 1.85222600  | 2.88055600  |
| N | -0.13189600 | 1.27869200  | 0.91797800  |
| N | -0.16039000 | -0.66606100 | -0.94682100 |
| C | -0.47598100 | 5.45499300  | 0.00093800  |
| C | -1.37141000 | 6.26056000  | 0.71803200  |
| C | 0.36783800  | 6.05367400  | -0.94618200 |
| C | -1.43223900 | 7.63139000  | 0.48174800  |
| H | -2.03327700 | 5.80686400  | 1.44990300  |
| C | 0.31247500  | 7.42639700  | -1.17210700 |
| H | 1.08469300  | 5.44570700  | -1.49023500 |
| C | -0.59032600 | 8.21769300  | -0.46264500 |
| H | -2.13873000 | 8.24114400  | 1.03645200  |
| H | 0.97860200  | 7.87738900  | -1.90112500 |
| H | -0.63584400 | 9.28726600  | -0.64346400 |
| C | -0.84630300 | 0.13950700  | -5.11894100 |
| C | -1.85925200 | -0.54347800 | -5.80630400 |
| C | -0.00526600 | 1.00658300  | -5.83161400 |
| C | -2.03771000 | -0.35014100 | -7.17348700 |
| H | -2.51980500 | -1.21261400 | -5.26277300 |
| C | -0.17877600 | 1.18794200  | -7.20109500 |
| H | 0.80001000  | 1.52191300  | -5.31641400 |
| C | -1.19777400 | 0.51464100  | -7.87411100 |
| H | -2.83445600 | -0.87577600 | -7.69066200 |
| H | 0.48581300  | 1.85420300  | -7.74228400 |
| H | -1.33522600 | 0.66190200  | -8.94091300 |
| C | -4.44418200 | -2.61530300 | 1.30833700  |
| C | -3.44165200 | -3.55883900 | 1.48348700  |
| C | -2.10128700 | -3.17018000 | 1.45107700  |
| C | -2.73410900 | -0.96874800 | 1.07149200  |
| C | -4.08159800 | -1.28824800 | 1.10087900  |
| H | -5.48756700 | -2.90983500 | 1.33614600  |
| H | -3.68374400 | -4.60290000 | 1.64780200  |
| H | -2.41467600 | 0.05425500  | 0.91186700  |
| H | -4.82096300 | -0.50855000 | 0.96187500  |
| N | -1.75323900 | -1.87917900 | 1.24020500  |

|                                              |             |             |             |
|----------------------------------------------|-------------|-------------|-------------|
| C                                            | -1.03216000 | -4.20281600 | 1.64990400  |
| S                                            | -0.72979700 | -5.13928600 | 0.10120200  |
| C                                            | 0.34731300  | -6.43275000 | 0.77797400  |
| H                                            | 0.62588600  | -7.07762200 | -0.05714100 |
| H                                            | 1.25099200  | -5.99998100 | 1.21417700  |
| H                                            | -0.18618700 | -7.02226000 | 1.52665300  |
| H                                            | -0.09240500 | -3.75521500 | 1.97959500  |
| H                                            | -1.35404700 | -4.92003200 | 2.40939300  |
| O                                            | 1.85552500  | -3.18005700 | 0.41177400  |
| H                                            | 2.54990600  | -2.92687000 | -0.21194800 |
| H                                            | 1.31038700  | -3.82737300 | -0.06826300 |
| <b>TS<sub>d</sub></b> E=-2423.858677 Hartree |             |             |             |
| Ru                                           | 1.12525400  | -0.57638700 | -0.28040600 |
| C                                            | 3.90587400  | -0.04438800 | 1.02486300  |
| C                                            | 4.09517100  | 0.49414700  | -1.22527400 |
| C                                            | 5.42986100  | 0.85766800  | -1.08615700 |
| C                                            | 6.00633800  | 0.75737900  | 0.17588600  |
| C                                            | 5.24034600  | 0.30516100  | 1.24477100  |
| C                                            | 2.99842000  | -0.50624800 | 2.09905400  |
| C                                            | 0.82361400  | -1.09480900 | 2.69739900  |
| C                                            | 1.17687000  | -1.27600000 | 4.02636700  |
| C                                            | 2.50399000  | -1.07590100 | 4.38900800  |
| C                                            | 3.41699700  | -0.68363100 | 3.41846700  |
| H                                            | 3.59282500  | 0.55344900  | -2.18695900 |
| H                                            | 5.99320300  | 1.20832500  | -1.94286200 |
| H                                            | 7.04358400  | 1.03246500  | 0.33273100  |
| H                                            | 5.68513100  | 0.23686000  | 2.22918900  |
| H                                            | -0.19903800 | -1.23466300 | 2.36579300  |
| H                                            | 0.42436700  | -1.56991300 | 4.74813300  |
| H                                            | 2.82718200  | -1.21582900 | 5.41446900  |
| H                                            | 4.45010600  | -0.51736800 | 3.69394000  |
| N                                            | 1.70541200  | -0.73284700 | 1.75079700  |
| N                                            | 3.35899300  | 0.05390700  | -0.20252600 |
| C                                            | 0.26837500  | -0.95793400 | -4.58540300 |
| C                                            | 0.06349900  | 0.34407100  | -5.01942900 |
| C                                            | 0.08776200  | 1.37466500  | -4.03514900 |
| C                                            | 0.38629500  | 1.01610300  | -2.70238700 |
| C                                            | 0.54270200  | -1.22558800 | -3.24352400 |
| C                                            | -0.22731600 | 2.74490900  | -4.30834400 |
| C                                            | 0.42487500  | 2.02031200  | -1.67736500 |
| C                                            | 0.16269800  | 3.37312200  | -1.98644200 |
| C                                            | -0.19275700 | 3.69638300  | -3.33471700 |
| C                                            | 0.21002900  | 4.32003400  | -0.92118100 |
| C                                            | 0.47397300  | 3.84330100  | 0.35611900  |
| C                                            | 0.71411400  | 2.48370400  | 0.56771700  |
| H                                            | -0.52544800 | 3.02198700  | -5.31193600 |
| H                                            | 0.25195700  | -1.78186700 | -5.28919100 |
| H                                            | 0.71493900  | -2.24291300 | -2.91192600 |
| H                                            | -0.46415200 | 4.71644200  | -3.57696600 |
| H                                            | 0.52086300  | 4.52488400  | 1.19742600  |
| H                                            | 0.93555700  | 2.10654200  | 1.56122000  |
| N                                            | 0.69656900  | 1.59386000  | -0.41688900 |
| N                                            | 0.62678800  | -0.27216500 | -2.31900300 |
| C                                            | -0.01405300 | 5.76658600  | -1.12970900 |
| C                                            | -0.95939500 | 6.44590200  | -0.34846300 |
| C                                            | 0.73637100  | 6.48705500  | -2.07037700 |
| C                                            | -1.16176700 | 7.81289500  | -0.51723500 |

|                                                                            |             |             |              |
|----------------------------------------------------------------------------|-------------|-------------|--------------|
| H                                                                          | -1.55054400 | 5.89619500  | 0.37808400   |
| C                                                                          | 0.54036200  | 7.85651700  | -2.22709200  |
| H                                                                          | 1.49104100  | 5.97859400  | -2.66309100  |
| C                                                                          | -0.41211200 | 8.52136100  | -1.45555800  |
| H                                                                          | -1.90642200 | 8.32377700  | 0.08526500   |
| H                                                                          | 1.13554300  | 8.40409000  | -2.95119000  |
| H                                                                          | -0.56805500 | 9.58809600  | -1.58350600  |
| C                                                                          | -0.16481700 | 0.61248400  | -6.45492500  |
| C                                                                          | -1.13903100 | -0.11100200 | -7.15704200  |
| C                                                                          | 0.61632400  | 1.55037100  | -7.14642400  |
| C                                                                          | -1.33840900 | 0.11078900  | -8.51684500  |
| H                                                                          | -1.75425100 | -0.83464600 | -6.63041100  |
| C                                                                          | 0.42209600  | 1.76092400  | -8.50879900  |
| H                                                                          | 1.39382600  | 2.09767200  | -6.62164200  |
| C                                                                          | -0.55824200 | 1.04595300  | -9.19597500  |
| H                                                                          | -2.10476300 | -0.44769500 | -9.04529400  |
| H                                                                          | 1.04094600  | 2.48220200  | -9.03343600  |
| H                                                                          | -0.71181200 | 1.21539500  | -10.25725500 |
| C                                                                          | -4.08361800 | -1.72342800 | -0.36500800  |
| C                                                                          | -3.22569300 | -2.76929200 | -0.05053000  |
| C                                                                          | -1.85861100 | -2.52015400 | 0.10076100   |
| C                                                                          | -2.18158400 | -0.28431600 | -0.35958300  |
| C                                                                          | -3.55156000 | -0.44694400 | -0.51641800  |
| H                                                                          | -5.14728000 | -1.90134700 | -0.48320300  |
| H                                                                          | -3.60409500 | -3.77709200 | 0.08274100   |
| H                                                                          | -1.73667100 | 0.69865900  | -0.47155000  |
| H                                                                          | -4.17580700 | 0.40731200  | -0.75206400  |
| N                                                                          | -1.34032100 | -1.28773300 | -0.06535300  |
| C                                                                          | -0.94256600 | -3.65420300 | 0.45764900   |
| S                                                                          | -0.35094300 | -4.51800000 | -1.05065300  |
| C                                                                          | 0.45310700  | -5.94089700 | -0.26240800  |
| H                                                                          | 0.88116300  | -6.54464400 | -1.06440500  |
| H                                                                          | 1.25225300  | -5.61673500 | 0.40868500   |
| H                                                                          | -0.27876100 | -6.53706000 | 0.28652700   |
| H                                                                          | -0.08120900 | -3.30770100 | 1.03314400   |
| H                                                                          | -1.48093400 | -4.38992000 | 1.05981600   |
| O                                                                          | 2.25363700  | -2.70352000 | -0.55867300  |
| H                                                                          | 3.00829700  | -2.64922900 | -1.16325800  |
| H                                                                          | 1.63672800  | -3.35308900 | -0.95601800  |
| <b><sup>3</sup>Ru-H<sub>2</sub>O+H<sub>2</sub>O E=-2500.278104 Hartree</b> |             |             |              |
| Ru                                                                         | 1.39048000  | -0.86987300 | 1.65734900   |
| N                                                                          | -2.74464700 | -1.09148600 | 0.87337600   |
| O                                                                          | -0.45696100 | -1.78551700 | 2.35843800   |
| C                                                                          | 4.96748600  | 0.96348400  | -0.09937500  |
| C                                                                          | 5.84770100  | 0.99821300  | 0.97739000   |
| C                                                                          | 5.43770400  | 0.49615700  | 2.20631300   |
| C                                                                          | 3.62049500  | -0.58372500 | 3.59294300   |
| C                                                                          | 1.75014300  | -1.52328100 | 4.62748300   |
| C                                                                          | 2.41887100  | -1.63698800 | 5.83802700   |
| C                                                                          | 3.73974200  | -1.20585200 | 5.91137300   |
| C                                                                          | 4.34595300  | -0.67320300 | 4.77962700   |
| H                                                                          | 2.98157000  | 0.38611400  | -0.71032100  |
| H                                                                          | 5.24520000  | 1.34428200  | -1.07475700  |
| H                                                                          | 6.84296100  | 1.41344700  | 0.86592100   |
| H                                                                          | 6.11267900  | 0.52345000  | 3.05188400   |
| H                                                                          | 0.71942000  | -1.83821400 | 4.51054200   |
| H                                                                          | 1.90877000  | -2.05504900 | 6.69749900   |

|   |             |             |             |
|---|-------------|-------------|-------------|
| H | 4.29560700  | -1.28084000 | 6.83923000  |
| H | 5.37314400  | -0.33525400 | 4.82714200  |
| N | 2.33440200  | -1.01431400 | 3.53172600  |
| N | 3.30174900  | -0.05929600 | 1.28094100  |
| C | 0.05149300  | -2.11041400 | -2.35855300 |
| C | -0.50158600 | -0.98993000 | -2.95919700 |
| C | -0.48706400 | 0.23036000  | -2.22396100 |
| C | 0.07939300  | 0.22225500  | -0.92897100 |
| C | 0.59025500  | -2.02797500 | -1.07379300 |
| C | -1.07202800 | 1.44681600  | -2.70165200 |
| C | 0.08469400  | 1.42819800  | -0.13755700 |
| C | -0.45452300 | 2.62612300  | -0.66208400 |
| C | -1.04991100 | 2.58995900  | -1.96296200 |
| C | -0.43793900 | 3.78160900  | 0.17368000  |
| C | 0.07455600  | 3.64543000  | 1.45607200  |
| C | 0.58259400  | 2.41230200  | 1.88127900  |
| H | -1.56538500 | 1.44625200  | -3.66556200 |
| H | 0.06868900  | -3.06196900 | -2.87626600 |
| H | 1.01977400  | -2.90359000 | -0.59785200 |
| H | -1.52404300 | 3.48348500  | -2.35040000 |
| H | 0.10736500  | 4.49601800  | 2.12738500  |
| H | 1.00209200  | 2.29853500  | 2.87734600  |
| N | 0.59372100  | 1.33766100  | 1.10989900  |
| N | 0.60486000  | -0.90116300 | -0.36736900 |
| C | -0.94972500 | 5.09530700  | -0.27541700 |
| C | -1.90557400 | 5.77340900  | 0.49351200  |
| C | -0.46242100 | 5.70016700  | -1.44291700 |
| C | -2.37424700 | 7.02273800  | 0.09523100  |
| H | -2.29392600 | 5.31091800  | 1.39621500  |
| C | -0.92459600 | 6.95461100  | -1.83221200 |
| H | 0.29598700  | 5.19650800  | -2.03509100 |
| C | -1.88436700 | 7.61667400  | -1.06730000 |
| H | -3.12314100 | 7.53135500  | 0.69451900  |
| H | -0.53109600 | 7.41550300  | -2.73294000 |
| H | -2.24760000 | 8.59249000  | -1.37492000 |
| C | -1.10475700 | -1.10506000 | -4.30464400 |
| C | -2.10349600 | -2.06281600 | -4.52990300 |
| C | -0.67988100 | -0.29734500 | -5.36869700 |
| C | -2.67624900 | -2.19771000 | -5.79197400 |
| H | -2.44003800 | -2.68990200 | -3.70860200 |
| C | -1.24664700 | -0.44415100 | -6.63208300 |
| H | 0.10931600  | 0.43197600  | -5.21101700 |
| C | -2.24907800 | -1.39004400 | -6.84530700 |
| H | -3.45705600 | -2.93503100 | -5.95124300 |
| H | -0.90235500 | 0.18051800  | -7.45049200 |
| H | -2.69381200 | -1.49846500 | -7.82978200 |
| C | -4.23262200 | -0.10288000 | -1.26086100 |
| C | -4.09529500 | -1.47206000 | -1.06662900 |
| C | -3.35805500 | -1.93365800 | 0.02833100  |
| C | -2.90095900 | 0.22612000  | 0.69002400  |
| C | -3.64319800 | 0.77114800  | -0.35022100 |
| H | -4.80282300 | 0.27640300  | -2.10267900 |
| H | -4.56134100 | -2.18107500 | -1.74302500 |
| H | -2.40318700 | 0.86993100  | 1.41196700  |
| H | -3.73799400 | 1.84630600  | -0.45143900 |
| C | 3.70293900  | 0.42851600  | 0.09692400  |
| C | -3.28143800 | -3.40197200 | 0.34173800  |

|                                                                          |             |             |             |
|--------------------------------------------------------------------------|-------------|-------------|-------------|
| S                                                                        | -2.23879000 | -4.33077300 | -0.84672700 |
| C                                                                        | -2.80651400 | -6.01095700 | -0.46560100 |
| H                                                                        | -2.22417800 | -6.68956800 | -1.09123500 |
| H                                                                        | -2.63341100 | -6.25554100 | 0.58498900  |
| H                                                                        | -3.86654700 | -6.12012200 | -0.70464400 |
| H                                                                        | -2.89241000 | -3.54952300 | 1.35173700  |
| H                                                                        | -4.28355300 | -3.83657500 | 0.29022300  |
| C                                                                        | 4.15536100  | -0.03470400 | 2.33767700  |
| H                                                                        | -1.28187700 | -1.52723600 | 1.86436300  |
| H                                                                        | -0.35010000 | -2.75698600 | 2.18315200  |
| O                                                                        | 0.03069200  | -4.31761300 | 1.55918800  |
| H                                                                        | -0.21540900 | -5.05438800 | 2.13442100  |
| H                                                                        | -0.49980000 | -4.44423200 | 0.74780400  |
| PATH SINGLET                                                             |             |             |             |
| <sup>1</sup> Ru-H <sub>2</sub> O+H <sub>2</sub> O E=-2500.296350 Hartree |             |             |             |
| Ru                                                                       | 1.37622500  | -0.92345500 | 1.50779400  |
| N                                                                        | -2.78373700 | -1.11473800 | 0.78907200  |
| O                                                                        | -0.47426500 | -1.79913700 | 2.28256000  |
| C                                                                        | 5.02524800  | 0.50140500  | -0.40409200 |
| C                                                                        | 5.81960500  | 0.84278000  | 0.68495900  |
| C                                                                        | 5.31912700  | 0.66130400  | 1.96871400  |
| C                                                                        | 3.41854900  | -0.08390500 | 3.46202700  |
| C                                                                        | 1.50299000  | -0.81836100 | 4.57361700  |
| C                                                                        | 2.07627700  | -0.58180500 | 5.81583100  |
| C                                                                        | 3.37175200  | -0.07669800 | 5.86534800  |
| C                                                                        | 4.05023700  | 0.17368300  | 4.67775800  |
| H                                                                        | 3.10445600  | -0.28949900 | -0.98535900 |
| H                                                                        | 5.37177400  | 0.62447700  | -1.42319900 |
| H                                                                        | 6.81581700  | 1.24567500  | 0.54152900  |
| H                                                                        | 5.92649600  | 0.92437400  | 2.82514900  |
| H                                                                        | 0.49777200  | -1.21097900 | 4.46725800  |
| H                                                                        | 1.51374900  | -0.79155800 | 6.71780500  |
| H                                                                        | 3.85323400  | 0.12129700  | 6.81648000  |
| H                                                                        | 5.05949100  | 0.56405700  | 4.70658600  |
| N                                                                        | 2.15406500  | -0.57424100 | 3.42687900  |
| N                                                                        | 3.26746000  | -0.18630600 | 1.07027700  |
| C                                                                        | 0.08542300  | -2.21454900 | -2.49980800 |
| C                                                                        | -0.46402300 | -1.06002000 | -3.04068800 |
| C                                                                        | -0.43082900 | 0.12120900  | -2.24438700 |
| C                                                                        | 0.13368200  | 0.02459300  | -0.95749100 |
| C                                                                        | 0.64573600  | -2.21007800 | -1.21925200 |
| C                                                                        | -0.98380500 | 1.38353000  | -2.63275800 |
| C                                                                        | 0.14100200  | 1.14823000  | -0.07591500 |
| C                                                                        | -0.36859300 | 2.39400500  | -0.49486700 |
| C                                                                        | -0.93946900 | 2.46708400  | -1.80709100 |
| C                                                                        | -0.35539200 | 3.47107200  | 0.43796300  |
| C                                                                        | 0.10337400  | 3.19659400  | 1.71998100  |
| C                                                                        | 0.58132800  | 1.93036600  | 2.06027000  |
| H                                                                        | -1.46819000 | 1.47032100  | -3.59750600 |
| H                                                                        | 0.08875500  | -3.13677500 | -3.06865400 |
| H                                                                        | 1.08526200  | -3.10677500 | -0.79482800 |
| H                                                                        | -1.38741800 | 3.39896600  | -2.12956100 |
| H                                                                        | 0.12659800  | 3.97563900  | 2.47302800  |
| H                                                                        | 0.95430400  | 1.72835900  | 3.05642800  |
| N                                                                        | 0.61986700  | 0.92370900  | 1.18602700  |
| N                                                                        | 0.66702800  | -1.12271500 | -0.45556100 |
| C                                                                        | -0.81067600 | 4.83373800  | 0.09385000  |

|                                               |             |             |             |
|-----------------------------------------------|-------------|-------------|-------------|
| C                                             | -1.74031800 | 5.49019700  | 0.91273200  |
| C                                             | -0.29187700 | 5.50710500  | -1.02215300 |
| C                                             | -2.15251000 | 6.78576000  | 0.61336300  |
| H                                             | -2.15426800 | 4.97515400  | 1.77457700  |
| C                                             | -0.69780300 | 6.80683500  | -1.31183800 |
| H                                             | 0.44974100  | 5.02104800  | -1.64914300 |
| C                                             | -1.63182000 | 7.44739000  | -0.49826000 |
| H                                             | -2.88188800 | 7.27769800  | 1.24936400  |
| H                                             | -0.27978900 | 7.32002400  | -2.17225400 |
| H                                             | -1.95080200 | 8.45927700  | -0.72844200 |
| C                                             | -1.08588600 | -1.09989200 | -4.38141500 |
| C                                             | -2.09686500 | -2.03578100 | -4.64217000 |
| C                                             | -0.67217600 | -0.23783800 | -5.40650500 |
| C                                             | -2.69157400 | -2.09660700 | -5.89974200 |
| H                                             | -2.42567700 | -2.70401800 | -3.85069600 |
| C                                             | -1.26157300 | -0.30987600 | -6.66609000 |
| H                                             | 0.12708000  | 0.47441400  | -5.22310700 |
| C                                             | -2.27534300 | -1.23492000 | -6.91406700 |
| H                                             | -3.48126900 | -2.81800300 | -6.08598500 |
| H                                             | -0.92546400 | 0.35627000  | -7.45466200 |
| H                                             | -2.73746200 | -1.28562400 | -7.89520200 |
| C                                             | -4.21787900 | -0.16942500 | -1.40197100 |
| C                                             | -4.06549800 | -1.53413500 | -1.18995900 |
| C                                             | -3.35608400 | -1.97366100 | -0.06761100 |
| C                                             | -2.95600300 | 0.19814300  | 0.58793600  |
| C                                             | -3.67201300 | 0.72218500  | -0.48108900 |
| H                                             | -4.76657400 | 0.19294200  | -2.26528100 |
| H                                             | -4.49855700 | -2.25675100 | -1.87378700 |
| H                                             | -2.49455000 | 0.85702000  | 1.32070000  |
| H                                             | -3.78127000 | 1.79468400  | -0.59483900 |
| C                                             | 3.75656000  | -0.00843300 | -0.16727900 |
| C                                             | -3.27089700 | -3.43718700 | 0.26612900  |
| S                                             | -2.25765300 | -4.38602800 | -0.93085400 |
| C                                             | -2.81961000 | -6.05816300 | -0.50884100 |
| H                                             | -2.25502900 | -6.74891900 | -1.13738500 |
| H                                             | -2.61992300 | -6.28490800 | 0.54091100  |
| H                                             | -3.88572900 | -6.16846900 | -0.71874900 |
| H                                             | -2.86045600 | -3.56884300 | 1.26972900  |
| H                                             | -4.27469700 | -3.87119400 | 0.24490300  |
| C                                             | 4.03641400  | 0.14464900  | 2.14283600  |
| H                                             | -1.30381900 | -1.53169400 | 1.80844200  |
| H                                             | -0.37081400 | -2.76159700 | 2.07543000  |
| O                                             | 0.06242500  | -4.32070200 | 1.43209100  |
| H                                             | -0.14562600 | -5.06838900 | 2.00830200  |
| H                                             | -0.48125400 | -4.46218200 | 0.63240400  |
| <b>TS<sub>50</sub> E=-2500.293708 Hartree</b> |             |             |             |
| Ru                                            | 1.24669300  | -0.72161800 | 1.42987000  |
| N                                             | -2.78482700 | -1.42495500 | 0.26245000  |
| O                                             | -0.76127900 | -1.14924000 | 2.19840600  |
| C                                             | 5.10048900  | -0.00143800 | -0.46202300 |
| C                                             | 5.95064000  | 0.12015200  | 0.63169200  |
| C                                             | 5.42365900  | -0.00000800 | 1.91186900  |
| C                                             | 3.40701200  | -0.36118800 | 3.39408700  |
| C                                             | 1.37339200  | -0.62680200 | 4.50430900  |
| C                                             | 1.98863500  | -0.56316800 | 5.74698800  |
| C                                             | 3.36922600  | -0.39886500 | 5.79772200  |
| C                                             | 4.08481200  | -0.29524300 | 4.61059700  |



|   |             |             |             |
|---|-------------|-------------|-------------|
| H | 3.05590900  | -0.34665600 | -1.05590600 |
| H | 5.46386500  | 0.08828800  | -1.47875700 |
| H | 7.00924600  | 0.30952300  | 0.49469900  |
| H | 6.07275500  | 0.09987400  | 2.77216000  |
| H | 0.30050900  | -0.74977000 | 4.40548000  |
| H | 1.39196900  | -0.64309700 | 6.64778400  |
| H | 3.88665000  | -0.34920900 | 6.74923700  |
| H | 5.15907600  | -0.16571800 | 4.64014000  |
| N | 2.06097100  | -0.53389600 | 3.35640800  |
| N | 3.23882600  | -0.36473900 | 1.00075400  |
| C | -0.08350500 | -1.77857600 | -2.63602300 |
| C | -0.56036500 | -0.57256100 | -3.13521700 |
| C | -0.48031800 | 0.56835400  | -2.28322000 |
| C | 0.09444800  | 0.39428000  | -1.00846700 |
| C | 0.46410700  | -1.85723700 | -1.35314600 |
| C | -1.02093000 | 1.85841600  | -2.59174800 |
| C | 0.19610800  | 1.48788100  | -0.09383700 |
| C | -0.28087500 | 2.76674800  | -0.44585600 |
| C | -0.92669900 | 2.90115200  | -1.71854000 |
| C | -0.14513700 | 3.81862700  | 0.50607700  |
| C | 0.41520900  | 3.49607500  | 1.73514100  |
| C | 0.84484500  | 2.19832400  | 2.01468300  |
| H | -1.54238100 | 1.99905000  | -3.53048100 |
| H | -0.11661600 | -2.67476000 | -3.24462400 |
| H | 0.84127700  | -2.79587500 | -0.96251900 |
| H | -1.37221100 | 3.85329000  | -1.97912400 |
| H | 0.54699100  | 4.25776900  | 2.49467600  |
| H | 1.28440200  | 1.95325600  | 2.97343800  |
| N | 0.74584100  | 1.20855800  | 1.12722500  |
| N | 0.55170100  | -0.80231500 | -0.54971200 |
| C | -0.57586600 | 5.20635400  | 0.23707700  |
| C | -1.40416400 | 5.86868700  | 1.15451000  |
| C | -0.13564000 | 5.89562400  | -0.90253400 |
| C | -1.79625000 | 7.18511800  | 0.92878900  |
| H | -1.75689900 | 5.34198700  | 2.03635500  |
| C | -0.52088900 | 7.21590900  | -1.11938000 |
| H | 0.52994300  | 5.40534000  | -1.60673300 |
| C | -1.35530200 | 7.86198700  | -0.20781500 |
| H | -2.44742500 | 7.68123300  | 1.64178900  |
| H | -0.16430600 | 7.74077100  | -2.00015800 |
| H | -1.65857100 | 8.88988400  | -0.38133700 |
| C | -1.13909900 | -0.51810100 | -4.49362700 |
| C | -2.10931400 | -1.45738800 | -4.87287600 |
| C | -0.71298700 | 0.43403800  | -5.43135600 |
| C | -2.65669200 | -1.43017700 | -6.15234400 |
| H | -2.44855800 | -2.19754100 | -4.15434700 |
| C | -1.25410400 | 0.45095700  | -6.71404700 |
| H | 0.06170500  | 1.14657000  | -5.16416500 |
| C | -2.23143600 | -0.47568500 | -7.07564800 |
| H | -3.41682500 | -2.15514900 | -6.42652800 |
| H | -0.90770500 | 1.18765400  | -7.43218400 |
| H | -2.65707200 | -0.45601200 | -8.07419600 |
| C | -4.36587200 | -1.50502400 | -2.02727000 |
| C | -4.01313400 | -2.67702000 | -1.36688500 |
| C | -3.22666400 | -2.59949400 | -0.21420500 |
| C | -3.13850900 | -0.30245000 | -0.37395000 |
| C | -3.92737500 | -0.28566000 | -1.51839500 |

|                                                              |             |             |             |
|--------------------------------------------------------------|-------------|-------------|-------------|
| H                                                            | -4.97744400 | -1.54318000 | -2.92307000 |
| H                                                            | -4.34603700 | -3.64321500 | -1.73129400 |
| H                                                            | -2.76821600 | 0.62686900  | 0.05383200  |
| H                                                            | -4.17940400 | 0.65442400  | -1.99630900 |
| C                                                            | 3.75343100  | -0.24309200 | -0.23379400 |
| C                                                            | -2.86816800 | -3.84135300 | 0.55119300  |
| S                                                            | -1.41277800 | -4.69247500 | -0.17544900 |
| C                                                            | -1.56329600 | -6.28816200 | 0.67488600  |
| H                                                            | -0.72681000 | -6.90399900 | 0.33987900  |
| H                                                            | -1.50408700 | -6.16158200 | 1.75844000  |
| H                                                            | -2.50183400 | -6.77784400 | 0.40641700  |
| H                                                            | -2.65606100 | -3.59811800 | 1.59499200  |
| H                                                            | -3.69937000 | -4.55023100 | 0.52153000  |
| C                                                            | 4.06079900  | -0.24043900 | 2.07816800  |
| H                                                            | -1.48429700 | -1.21181000 | 1.51617300  |
| H                                                            | -0.61913200 | -2.07710000 | 2.48642600  |
| O                                                            | 0.45156500  | -3.52034000 | 2.33349500  |
| H                                                            | 0.68055900  | -4.20267100 | 2.97797300  |
| H                                                            | 0.12718500  | -3.99392700 | 1.54423500  |
| <b><sup>1</sup>Ru-2H<sub>2</sub>O</b> E=-2500.306057 Hartree |             |             |             |
| Ru                                                           | 0.90476600  | -0.81446200 | 1.41052000  |
| N                                                            | -3.01963000 | -1.77550200 | 0.18405300  |
| O                                                            | -1.25061400 | -1.10229400 | 2.21180900  |
| C                                                            | 4.77102700  | -0.38024300 | -0.56342400 |
| C                                                            | 5.65076900  | -0.28086900 | 0.50881900  |
| C                                                            | 5.14460200  | -0.33014700 | 1.80150600  |
| C                                                            | 3.14405400  | -0.52343000 | 3.33547200  |
| C                                                            | 1.13209200  | -0.66049300 | 4.49996700  |
| C                                                            | 1.77855800  | -0.58308600 | 5.72595200  |
| C                                                            | 3.16545700  | -0.47819100 | 5.73984500  |
| C                                                            | 3.85380400  | -0.44585500 | 4.53312300  |
| H                                                            | 2.69773000  | -0.61274400 | -1.10724400 |
| H                                                            | 5.11666500  | -0.34579700 | -1.58966100 |
| H                                                            | 6.71614800  | -0.16532000 | 0.34506700  |
| H                                                            | 5.81695700  | -0.25109000 | 2.64598800  |
| H                                                            | 0.05213600  | -0.73345200 | 4.43886600  |
| H                                                            | 1.19982000  | -0.60561100 | 6.64153500  |
| H                                                            | 3.70802400  | -0.41865400 | 6.67661700  |
| H                                                            | 4.93275400  | -0.35990800 | 4.53181000  |
| N                                                            | 1.79051800  | -0.63705200 | 3.33149800  |
| N                                                            | 2.91909200  | -0.57744500 | 0.94587800  |
| C                                                            | -0.43544700 | -1.68196900 | -2.74867900 |
| C                                                            | -0.82911800 | -0.43910400 | -3.22644700 |
| C                                                            | -0.74028700 | 0.66516800  | -2.32870400 |
| C                                                            | -0.21123400 | 0.43107400  | -1.04134800 |
| C                                                            | 0.05143600  | -1.82471100 | -1.44809200 |
| C                                                            | -1.21174600 | 1.98491200  | -2.62365600 |
| C                                                            | -0.05448700 | 1.51059800  | -0.11019700 |
| C                                                            | -0.45281900 | 2.81843300  | -0.45785100 |
| C                                                            | -1.07854400 | 3.00674800  | -1.73273300 |
| C                                                            | -0.25374100 | 3.85782700  | 0.49661100  |
| C                                                            | 0.28056000  | 3.50000000  | 1.72650300  |
| C                                                            | 0.63427800  | 2.17701900  | 1.99632500  |
| H                                                            | -1.70721000 | 2.16579300  | -3.56950900 |
| H                                                            | -0.47924900 | -2.55597900 | -3.38796500 |
| H                                                            | 0.36619100  | -2.79523500 | -1.08385300 |
| H                                                            | -1.46971400 | 3.98496700  | -1.98359800 |

|   |             |             |             |
|---|-------------|-------------|-------------|
| H | 0.45670700  | 4.25044900  | 2.48824900  |
| H | 1.06157100  | 1.90381600  | 2.95384400  |
| N | 0.48349100  | 1.19659900  | 1.10709500  |
| N | 0.17100200  | -0.80289000 | -0.60461400 |
| C | -0.58544800 | 5.27217600  | 0.22287200  |
| C | -1.37592000 | 5.99333700  | 1.12888300  |
| C | -0.08177100 | 5.92688100  | -0.91093100 |
| C | -1.66915000 | 7.33445300  | 0.89744400  |
| H | -1.77685800 | 5.49469700  | 2.00641400  |
| C | -0.36759800 | 7.27120800  | -1.13330100 |
| H | 0.55499000  | 5.38856700  | -1.60669700 |
| C | -1.16533400 | 7.97673200  | -0.23311300 |
| H | -2.29259900 | 7.87703900  | 1.60133700  |
| H | 0.03743900  | 7.76774400  | -2.00957200 |
| H | -1.39145400 | 9.02364500  | -0.41074200 |
| C | -1.31506200 | -0.30574300 | -4.61573400 |
| C | -2.29032600 | -1.18736100 | -5.10416200 |
| C | -0.78237500 | 0.66264000  | -5.48002000 |
| C | -2.73810800 | -1.08778100 | -6.41835100 |
| H | -2.70992100 | -1.94170100 | -4.44564600 |
| C | -1.22359300 | 0.75162600  | -6.79735400 |
| H | -0.00238200 | 1.33067800  | -5.12725600 |
| C | -2.20670000 | -0.11814000 | -7.26798800 |
| H | -3.50310400 | -1.76909000 | -6.77768300 |
| H | -0.79485700 | 1.49960600  | -7.45702000 |
| H | -2.55419800 | -0.04332300 | -8.29379300 |
| C | -4.43302500 | -2.32513400 | -2.14532100 |
| C | -4.01031000 | -3.35674100 | -1.31338300 |
| C | -3.30963800 | -3.04335100 | -0.14659400 |
| C | -3.43589100 | -0.78884500 | -0.61660800 |
| C | -4.14572500 | -1.00942000 | -1.79179800 |
| H | -4.98484900 | -2.54565600 | -3.05364700 |
| H | -4.22540400 | -4.39211400 | -1.55538000 |
| H | -3.18738400 | 0.22187300  | -0.30085200 |
| H | -4.45534700 | -0.17440100 | -2.41043700 |
| C | 3.41673300  | -0.52788400 | -0.30204200 |
| C | -2.86548200 | -4.12121800 | 0.79976300  |
| S | -1.26196600 | -4.84931800 | 0.28738200  |
| C | -1.12377000 | -6.14317700 | 1.55049600  |
| H | -0.18232500 | -6.66428400 | 1.36834900  |
| H | -1.10726500 | -5.70755500 | 2.55215300  |
| H | -1.95020300 | -6.85141000 | 1.46175600  |
| H | -2.76691600 | -3.72237700 | 1.81152700  |
| H | -3.59526900 | -4.93441600 | 0.81731400  |
| C | 3.77311700  | -0.47701600 | 2.00289800  |
| H | -1.90078000 | -1.33818400 | 1.48911300  |
| H | -1.27148700 | -1.86017800 | 2.81316500  |
| O | 1.18169100  | -3.11837100 | 1.69380600  |
| H | 2.00082200  | -3.43179000 | 1.28183300  |
| H | 0.46045000  | -3.61027500 | 1.24255200  |

## References

1. S. Bonnet, Ruthenium-Based Photoactivated Chemotherapy, *J. Am. Chem. Soc.*, 2023, **145**, 23397–23415
2. Chen, Q.; Cuello-Garibo, J.-A.; Bretin, L.; Zhang, L.; Ramu, V.; Aydar, Y.; Batsiun, Y.; Bronkhorst, S.; Husiev, Y.; Beztsinna, N.; Chen, L.; Zhou, X.-Q.; Schmidt, C.; Ott, I.; Jager, M. J.; Brouwer, A. M.; Snaar-Jagalska, B. E.; Bonnet, S. Photosubstitution in a Trisheteroleptic Ruthenium Complex Inhibits Conjunctival Melanoma Growth in a Zebrafish Orthotopic Xenograft Model. *Chem. Sci.* 2022, 13 (23), 6899–6919. <https://doi.org/10.1039/D2SC01646J>.
